# Supplementary material for: A family of Ru(ii) complexes built on a novel sexipyridine building block: synthesis, photophysical properties and the rare structural characterization of a triruthenium species
Source: Royal Society of Chemistry journal article supplement (doi:10.1039/c5dt00631g), 2015-01-01
Supplement: c5dt00631g1.pdf [file c5dt00631g1.pdf]

## Supporting Information

### **A family of Ru(II) complexes built on a novel sexipyridine building block: Synthesis, photophysical properties and the rare structural characterization of a triruthenium species.**

Baptiste Laramée-Milette<sup>†</sup>, Félix Lussier<sup>†</sup>, Ilaria Ciofini<sup>‡\*</sup> and Garry S. Hanan<sup>†\*</sup>

<sup>†</sup> Département de Chimie, Université de Montréal, Montréal, Québec, Canada, H3T 2B1.

<sup>‡</sup> PSL Research University, Institut de Recherche de Chimie Paris IRCP, CNRS – Chimie ParisTech, 11 rue Pierre et Marie Curie, F-75005 Paris, France.

#### **Table of Contents**

|                                                                                                    |       |
|----------------------------------------------------------------------------------------------------|-------|
| NMR ( <sup>1</sup> H, <sup>13</sup> C, COSY) spectra of <b>L</b> .....                             | 2-3   |
| NMR ( <sup>1</sup> H, <sup>13</sup> C) spectra of metal complexes .....                            | 4-6   |
| UV-vis and emission characterization of <b>L</b> .....                                             | 7     |
| Solid state characterization of [ <b>Ru<sub>3</sub>L</b> ][(BF <sub>4</sub> ) <sub>6</sub> ] ..... | 8-9   |
| Cyclic voltammetry data of the ligand and related Ru(II) complexes .....                           | 10-11 |
| DFT and TD-DFT details and results.....                                                            | 12-29 |

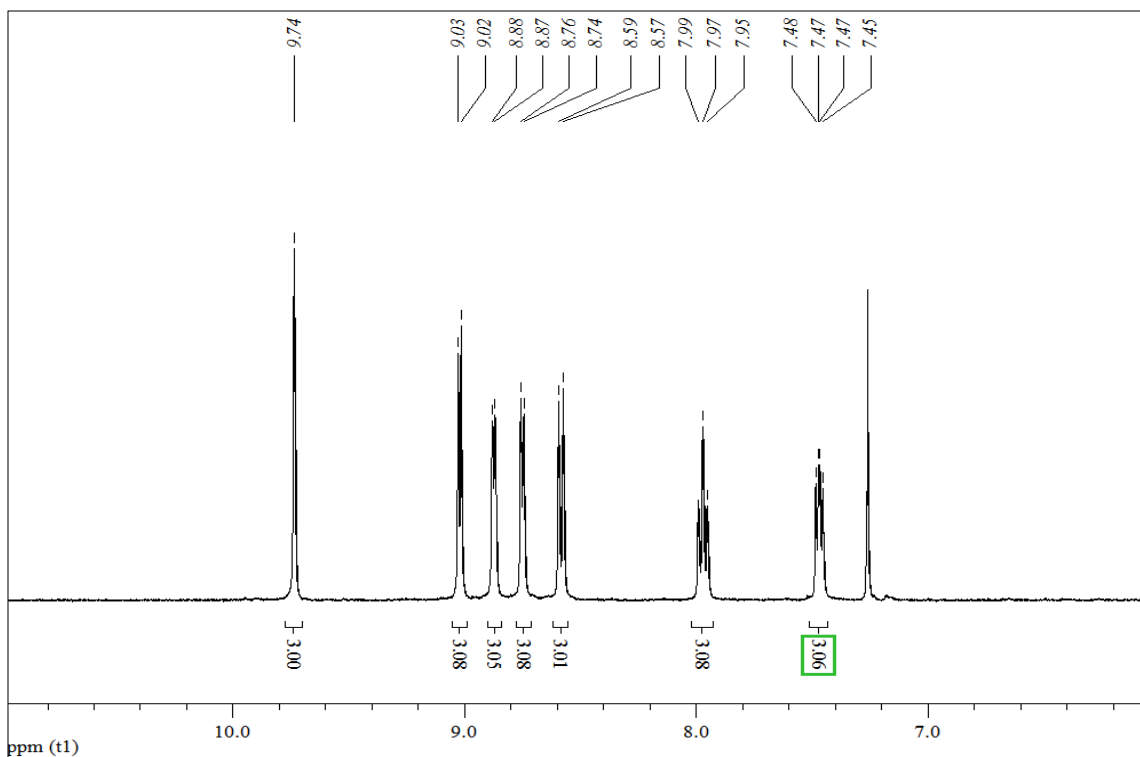

**Figure S1.**  $^1\text{H}$ -NMR spectrum (400 MHz) of **L** in  $\text{CDCl}_3$ .

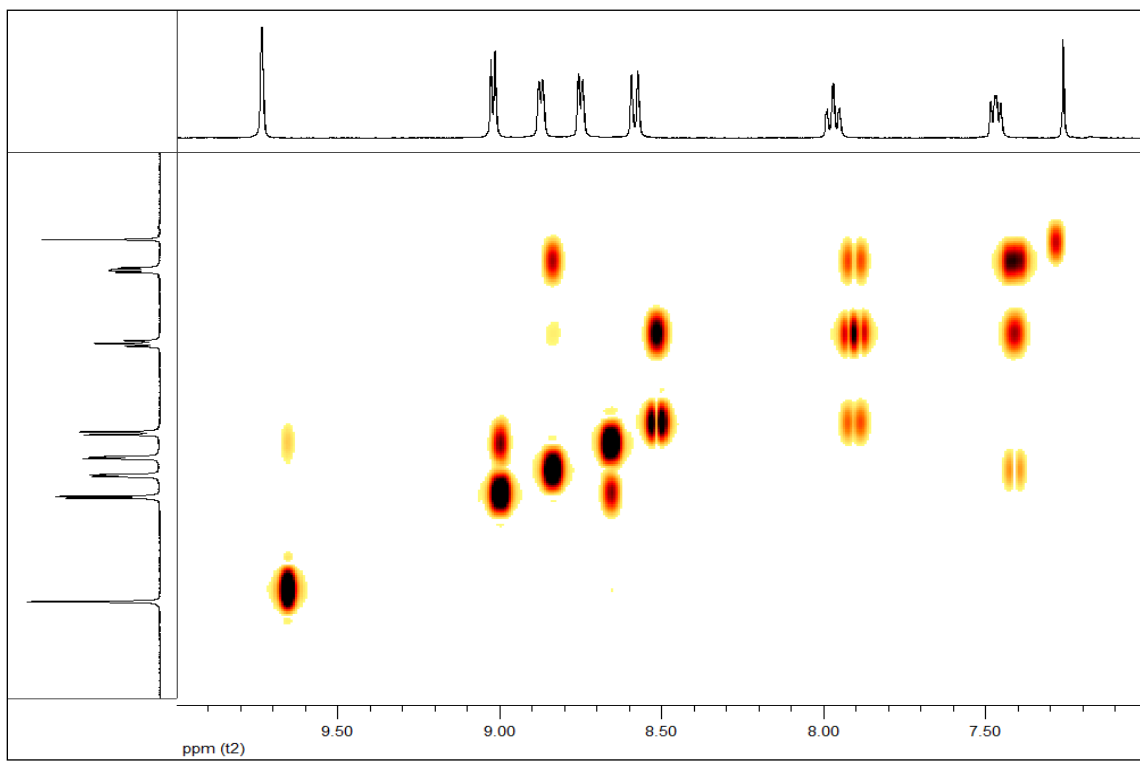

**Figure S2.** Expanded  $^1\text{H}$ - $^1\text{H}$  COSY spectrum (400 MHz) of **L** in  $\text{CDCl}_3$ .

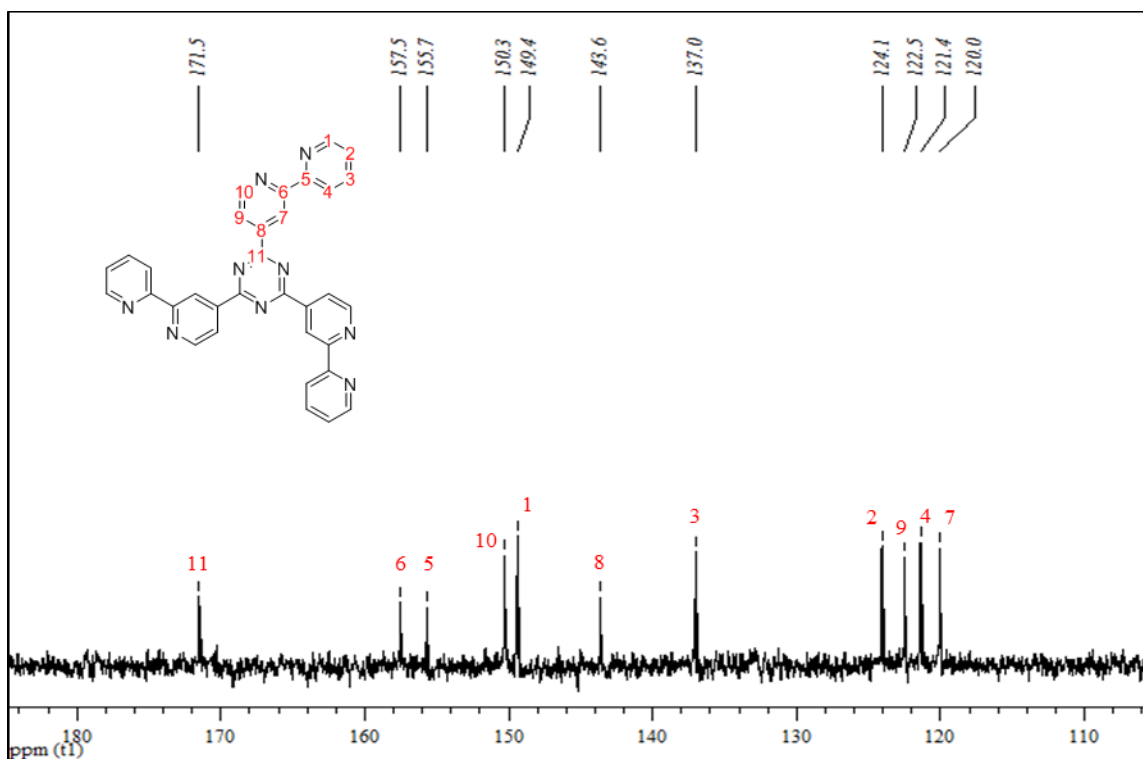

**Figure S3.** <sup>13</sup>C-NMR spectrum (100 MHz) of L in CDCl<sub>3</sub>.

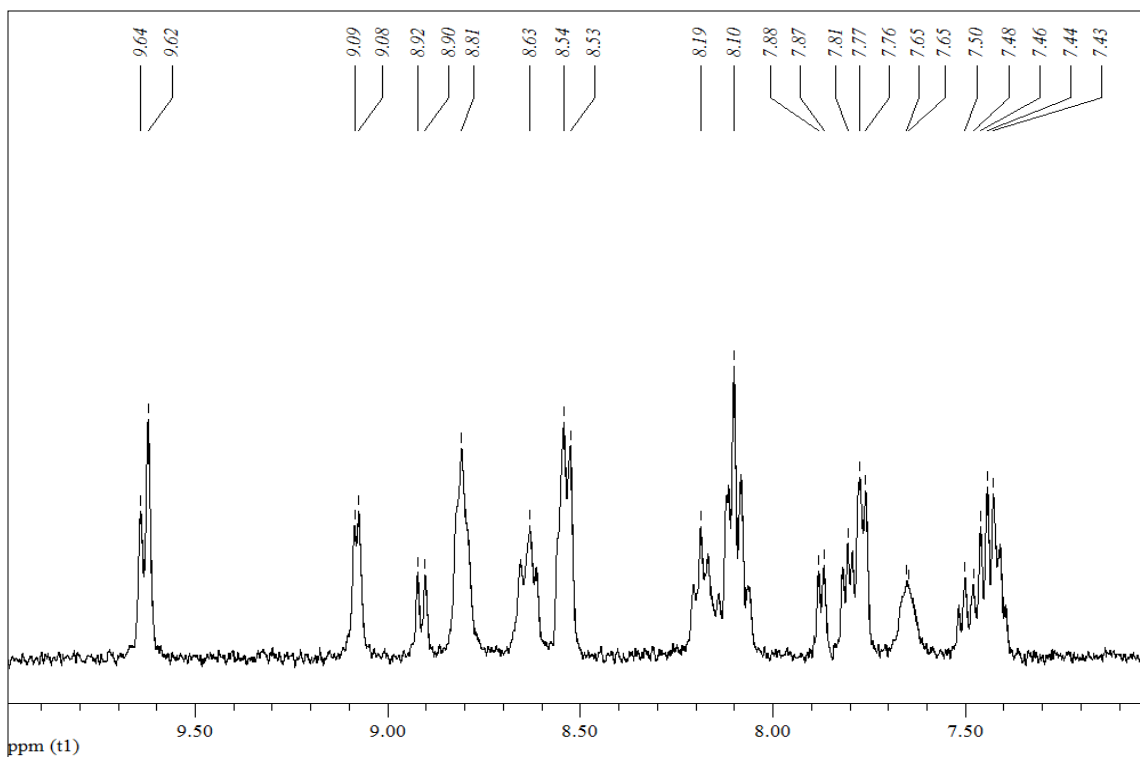

**Figure S4.**  $^1\text{H}$ -NMR spectrum (400 MHz) of  $[\text{RuL}][(\text{PF}_6)_2]$  in  $\text{CD}_3\text{CN}$ , at 1mg/mL.

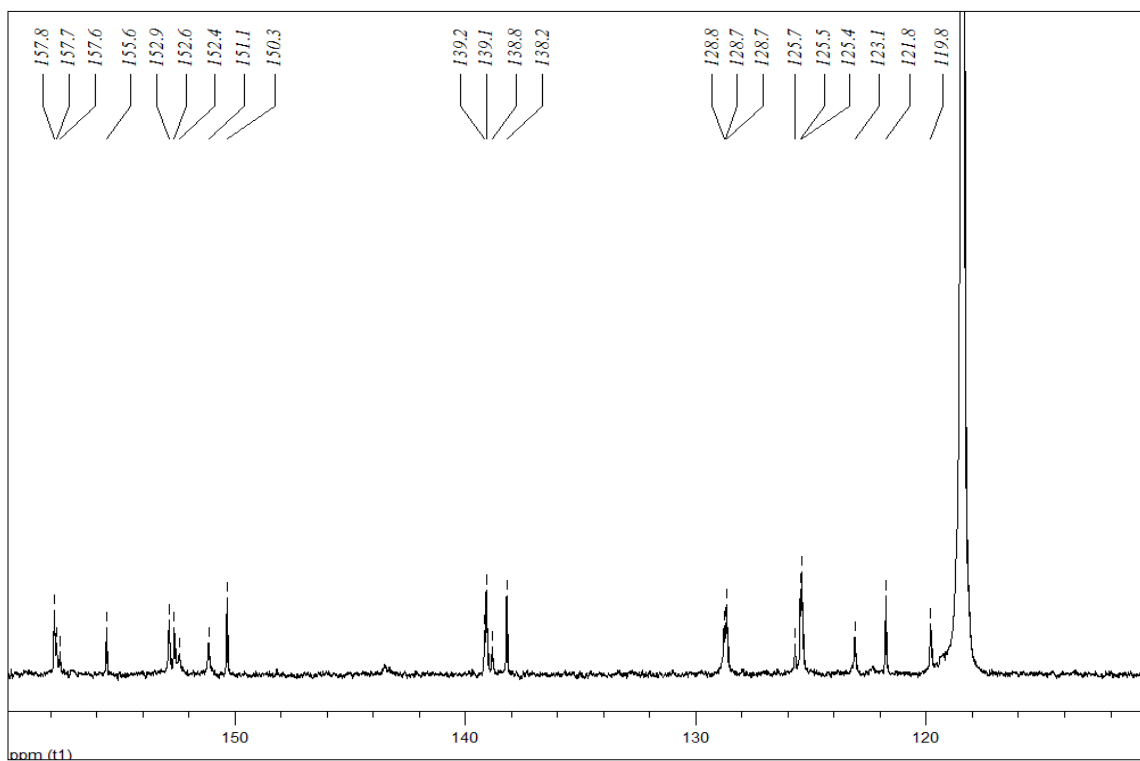

**Figure S5.**  $^{13}\text{C}$ -NMR spectrum (100 MHz) of  $[\text{RuL}][(\text{PF}_6)_2]$  in  $\text{CD}_3\text{CN}$ .

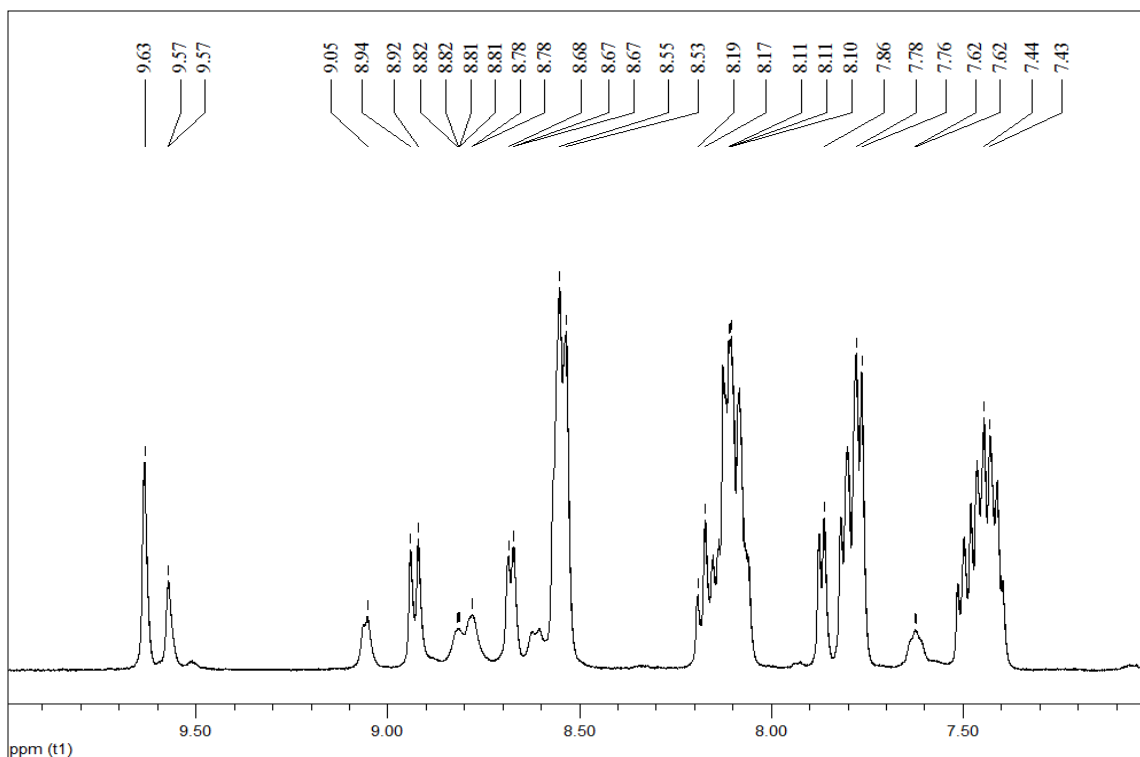

**Figure S6.**  $^1\text{H}$ -NMR spectrum (400 MHz) of  $[\text{Ru}_2\text{L}][(\text{PF}_6)_4]$  in  $\text{CD}_3\text{CN}$ .

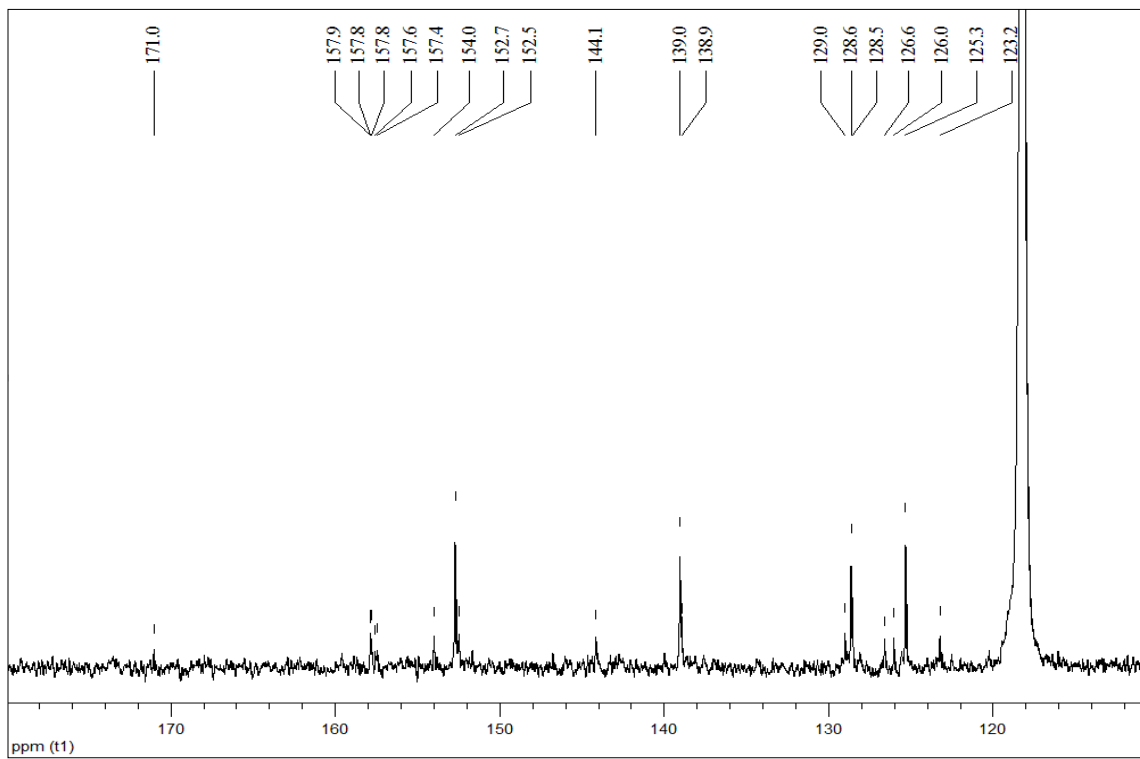

**Figure S7.**  $^{13}\text{C}$ -NMR spectrum (100 MHz) of  $[\text{Ru}_2\text{L}][(\text{PF}_6)_4]$  in  $\text{CD}_3\text{CN}$ .

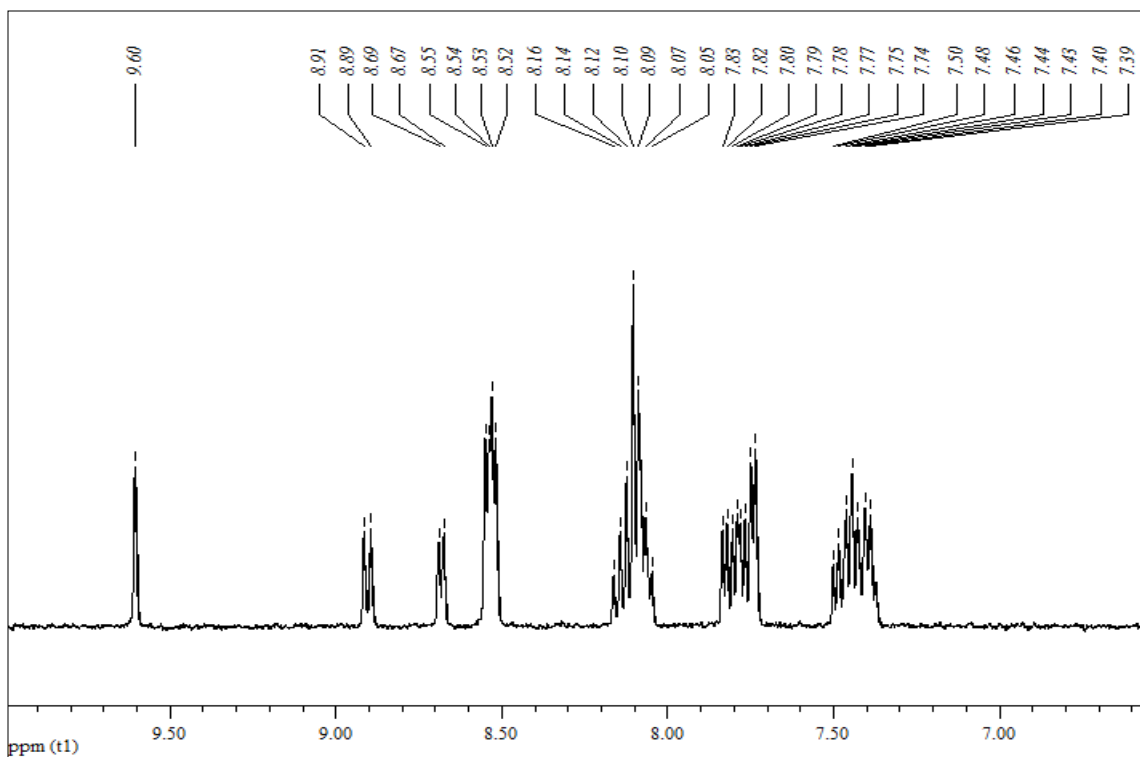

**Figure S8.**  $^1\text{H}$ -NMR spectrum (400 MHz) of  $[\text{Ru}_3\text{L}][(\text{PF}_6)_6]$  in  $\text{CD}_3\text{CN}$ .

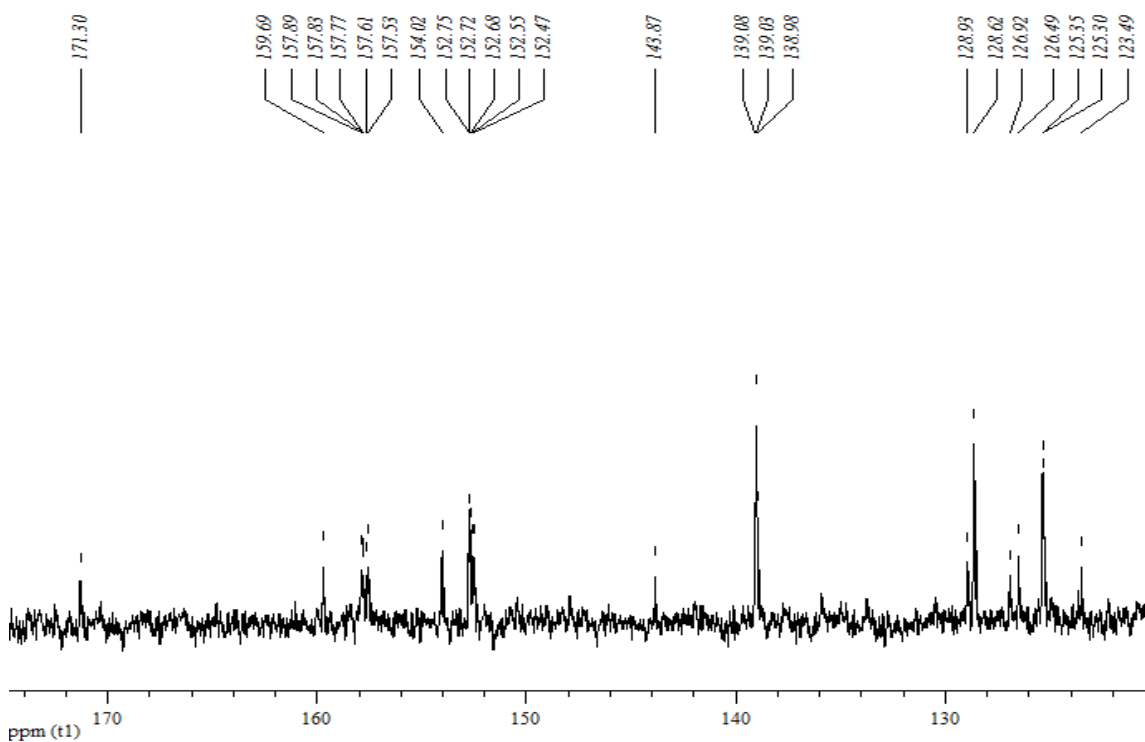

**Figure S9.**  $^{13}\text{C}$ -NMR spectrum (100 MHz) of  $[\text{Ru}_3\text{L}][(\text{PF}_6)_6]$  in  $\text{CD}_3\text{CN}$ .

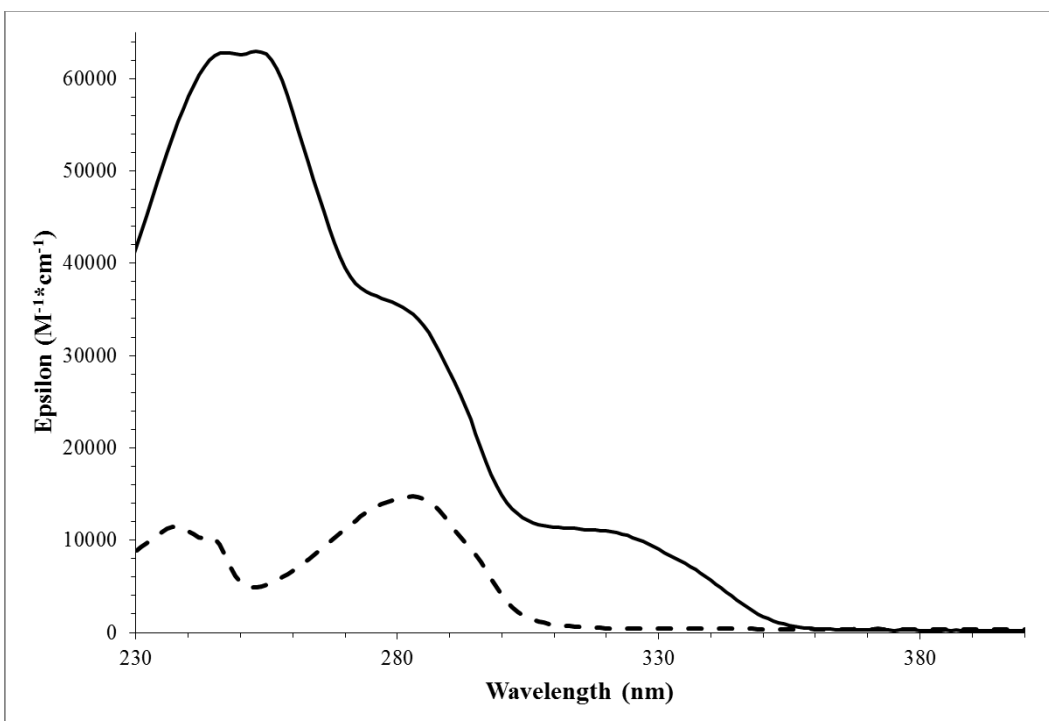

**Figure S10** Absorption spectra of ligand **L** (solid) and reference ligand 2,2'-bipyridine (dash) recorded in dichloromethane solution at ambient temperature.

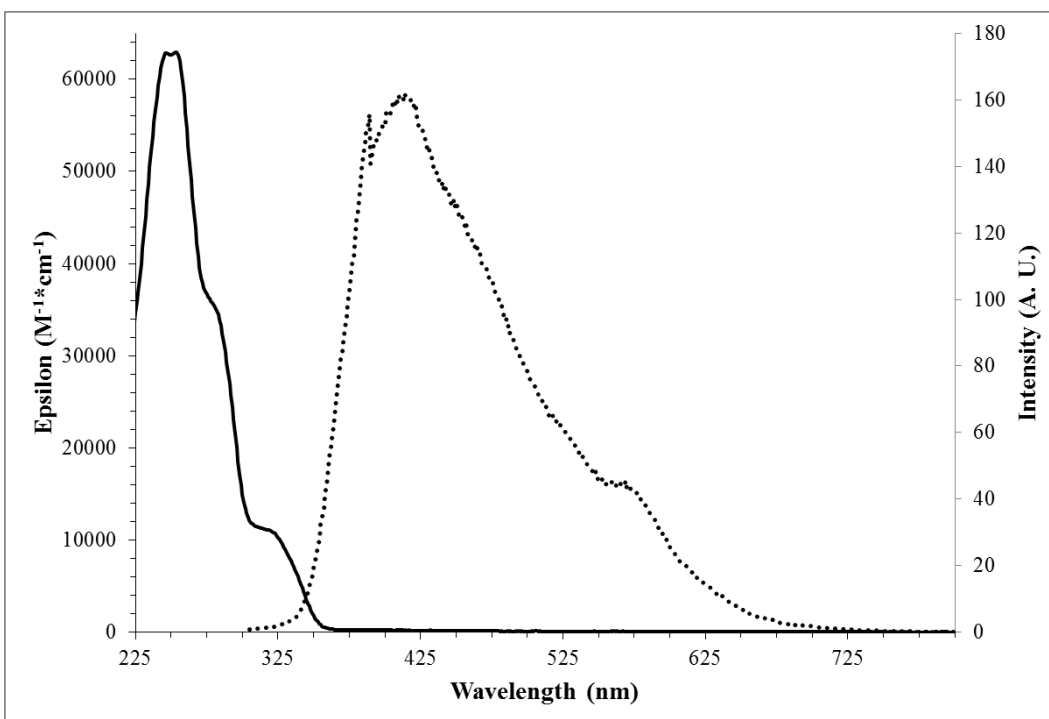

**Fig. S11** Comparison of the absorption spectra of ligand **L** (solid line) and its emission spectra (dotted line) recorded in dichloromethane solution at ambient temperature.

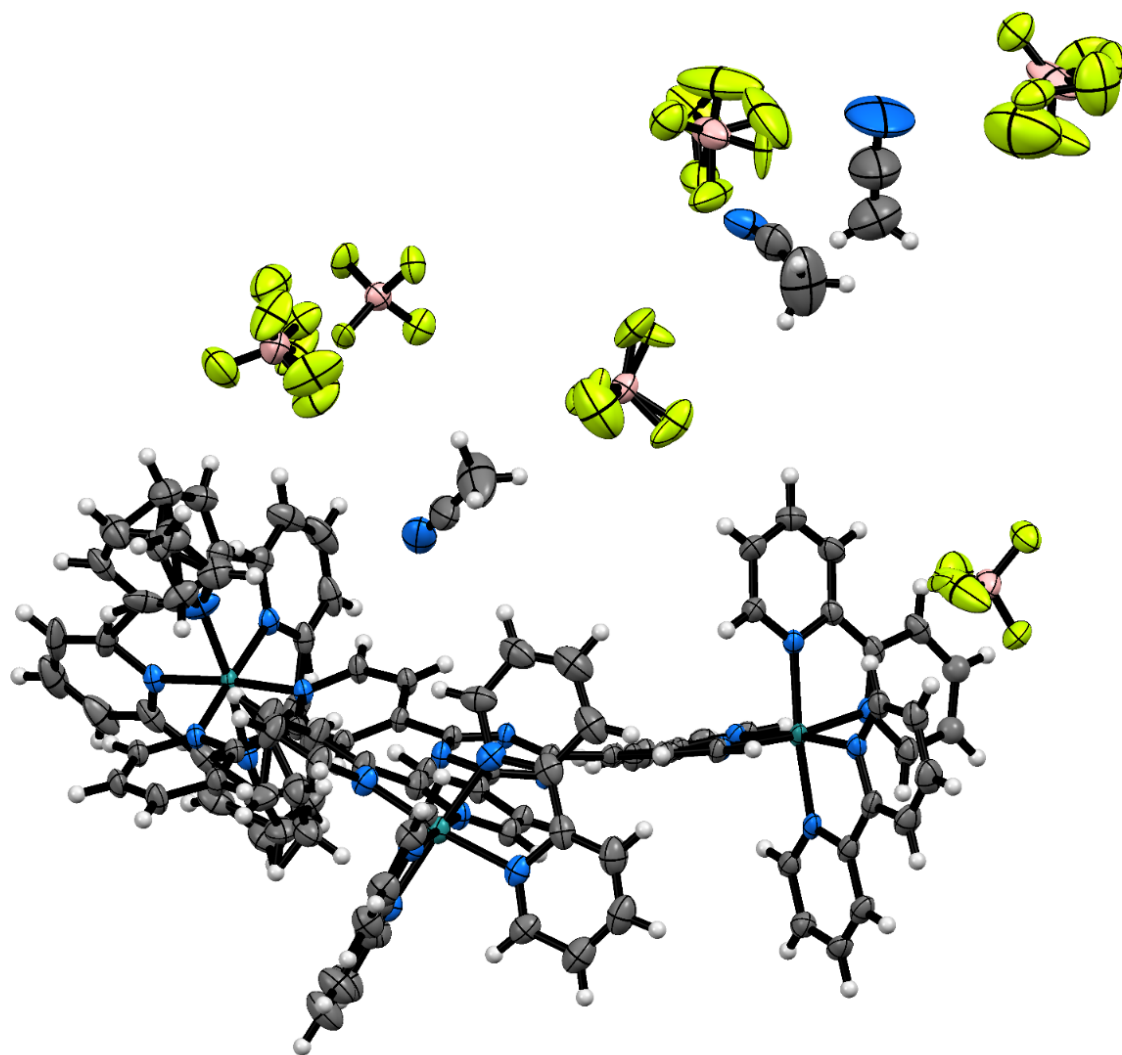

**Figure S12.** X-Ray structure of  $\text{Ru}_3\text{L}$  with the six counter-anions ( $\text{BF}_4$ , three of them have rotational disorder) and three molecules of solvent (acetonitrile). Thermal ellipsoids are shown with a 30% probability.



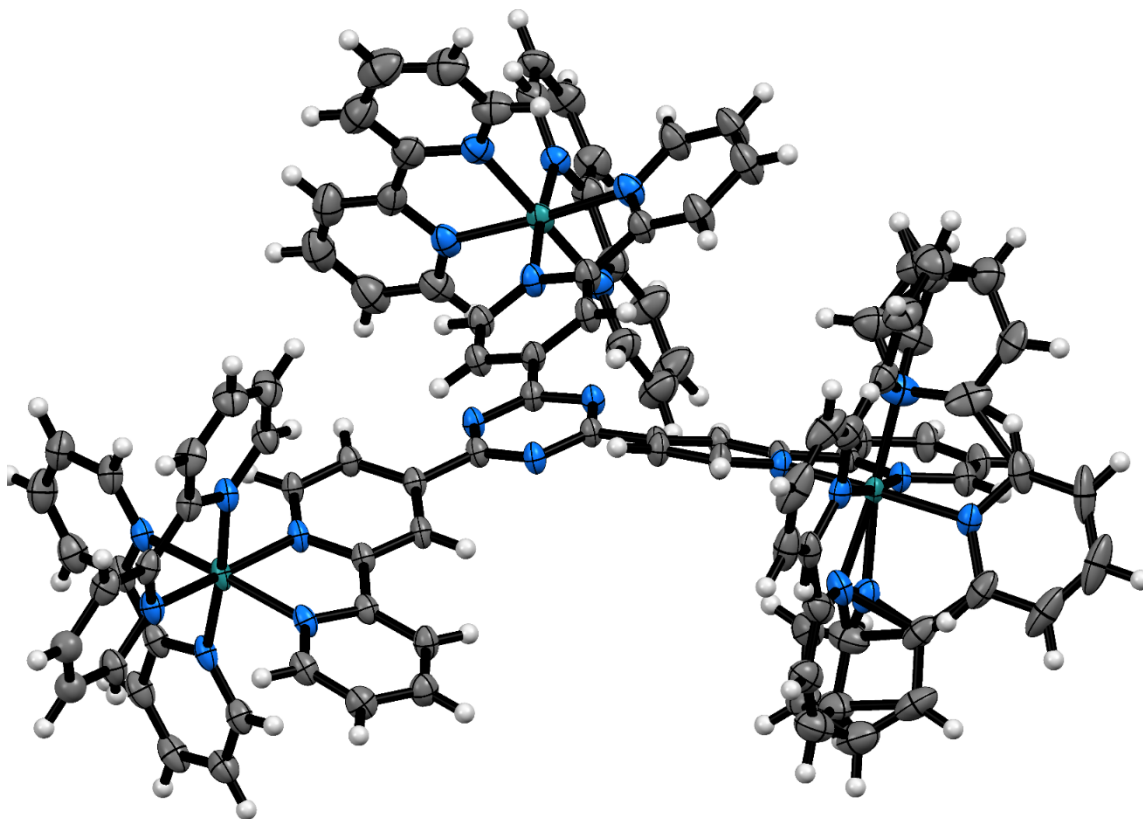

**Figure S13.** X-Ray structure of **Ru<sub>3</sub>L** with emphasis on the disordered ruthenium moiety (right). Thermal ellipsoids are shown with a 30% probability.

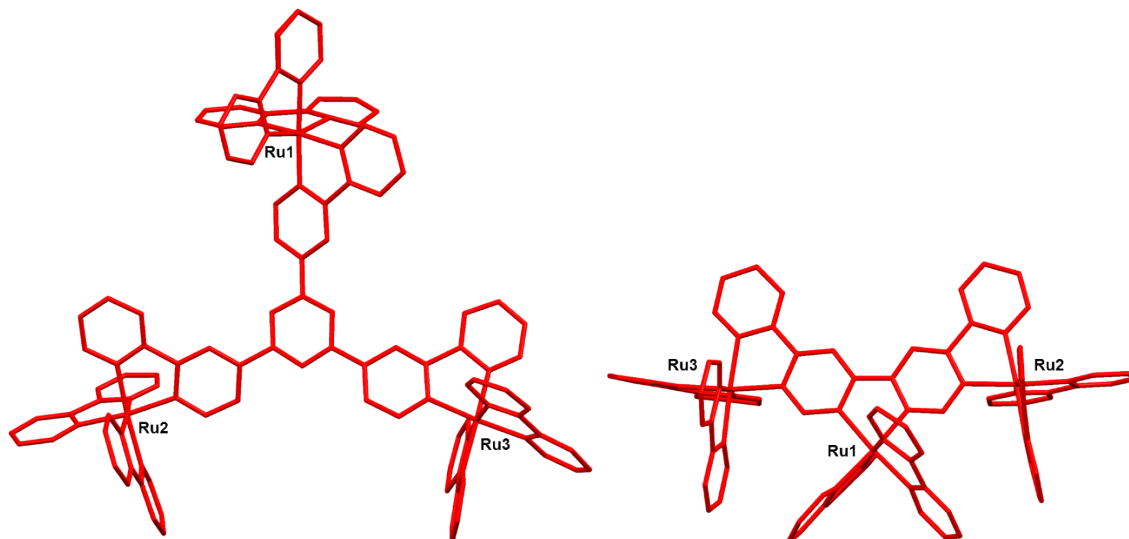

**Figure S14.** X-Ray crystal structure: Top-view of **Ru<sub>3</sub>L** (left) and the reference **triruthenium** species (right). **Ru<sub>3</sub>L** metal-to-metal distances: Ru1-Ru2 = 12.77 Å; Ru1-Ru3 = 12.99 Å; Ru2-Ru3 = 13.60 Å. **Triruthenium** metal-to-metal distances: Ru1-Ru2 = 6.11 Å; Ru1-Ru3 = 6.09 Å; Ru2-Ru3 = 11.01 Å.

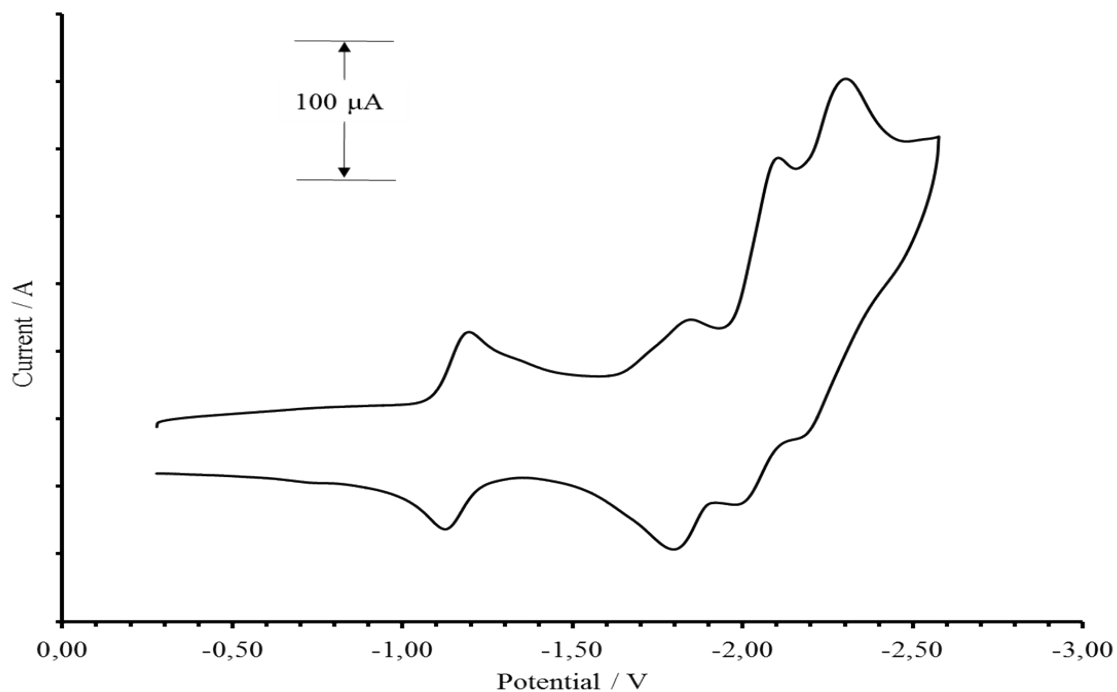

**Fig. S15** Cyclic voltammogram of ligand **L** obtained at a scan rate of 500 mV/s. At lower scan rate (25, 50, 100 and 200 mV/s) the second, third and fourth processes are not fully reversible.

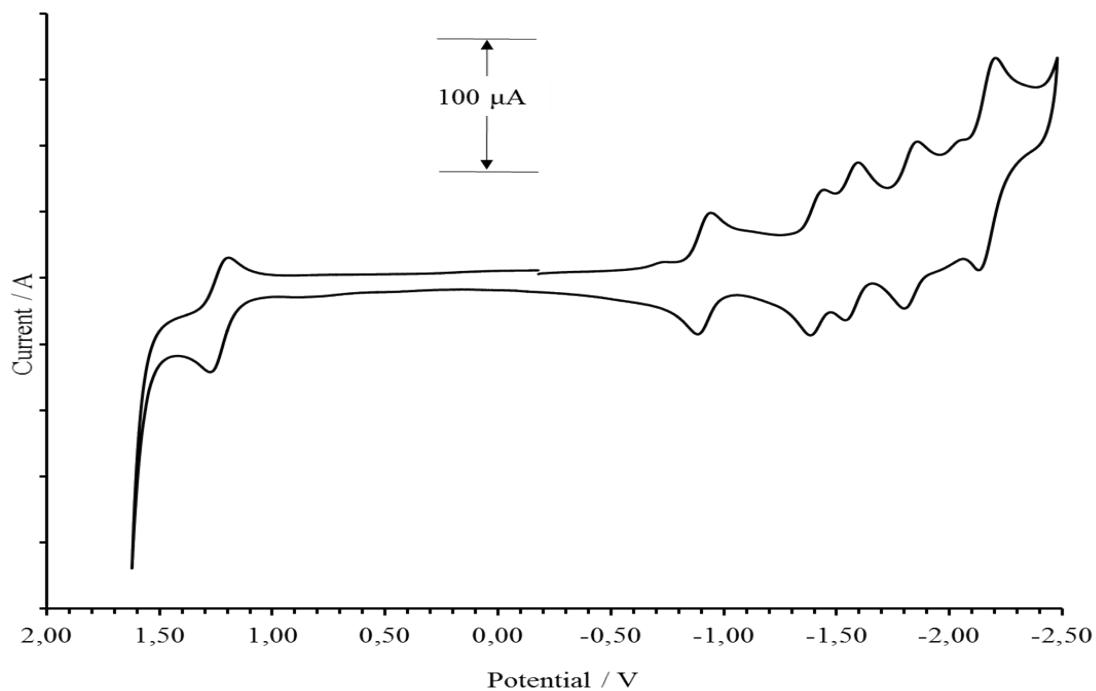

**Fig. S16** Cyclic voltammogram of complex **RuL** obtained at a scan rate of 50 mV/s in deaerated DMF, using TBAPF<sub>6</sub> as supporting electrolyte.

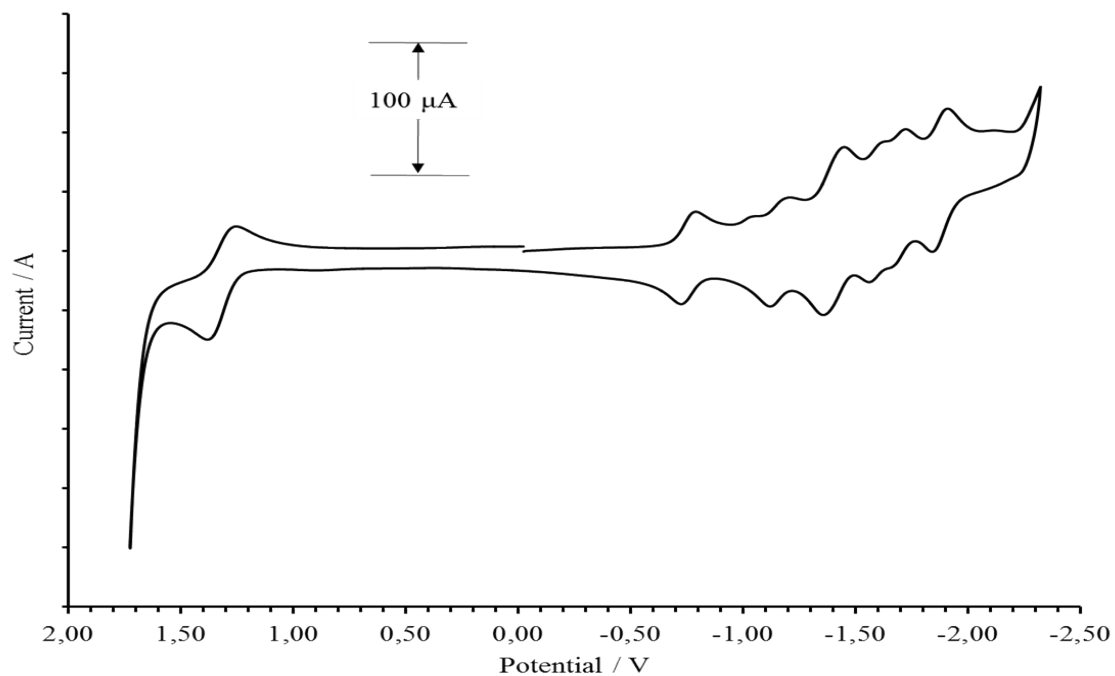

**Fig. S17** Cyclic voltammogram of complex **Ru<sub>2</sub>L** obtained at a scan rate of 50 mV/s in deaerated DMF, using TBAPF<sub>6</sub> as supporting electrolyte.

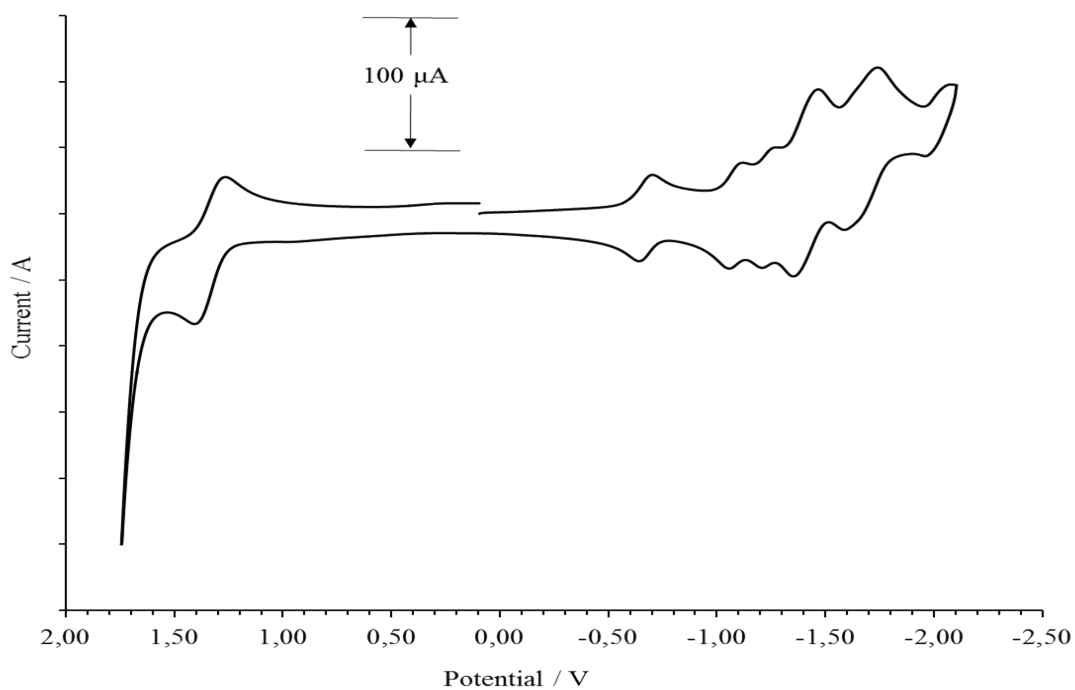

**Fig. S18** Cyclic voltammogram of complex **Ru<sub>3</sub>L** obtained at a scan rate of 50 mV/s in deaerated DMF, using TBAPF<sub>6</sub> as supporting electrolyte.

**Table S1.** Atomic coordinates for DFT optimization of **RuL** in ( $S=0$ ) PBE0/LANL2DZ CPCM: CH<sub>3</sub>CN.

| Standard orientation : |               |             |                         |           |           |
|------------------------|---------------|-------------|-------------------------|-----------|-----------|
| Center Number          | Atomic Number | Atomic Type | Coordinates (Angstroms) |           |           |
|                        |               |             | X                       | Y         | Z         |
| 1                      | 6             | 0           | -7.282107               | -3.577066 | 0.102648  |
| 2                      | 6             | 0           | -8.770033               | -3.563552 | 0.118540  |
| 3                      | 6             | 0           | -6.554284               | -2.375243 | 0.049632  |
| 4                      | 6             | 0           | -9.473751               | -2.540558 | 0.783036  |
| 5                      | 6             | 0           | -5.151500               | -2.419988 | 0.040275  |
| 6                      | 6             | 0           | -10.874735              | -2.560209 | 0.777594  |
| 7                      | 6             | 0           | -4.515420               | -3.671428 | 0.084807  |
| 8                      | 6             | 0           | -11.537107              | -3.598851 | 0.108116  |
| 9                      | 6             | 0           | -5.314399               | -4.819940 | 0.135457  |
| 10                     | 6             | 0           | -10.761530              | -4.579209 | -0.529021 |
| 11                     | 6             | 0           | -4.266498               | 1.126298  | -0.123371 |
| 12                     | 6             | 0           | -4.361511               | -1.173439 | -0.018369 |
| 13                     | 6             | 0           | -2.324999               | -0.104743 | -0.057621 |
| 14                     | 1             | 0           | -7.056351               | -1.417003 | -0.006166 |
| 15                     | 1             | 0           | -8.940385               | -1.760040 | 1.314166  |
| 16                     | 1             | 0           | -3.434899               | -3.742633 | 0.079535  |
| 17                     | 1             | 0           | -12.619525              | -3.653737 | 0.078512  |
| 18                     | 1             | 0           | -4.859512               | -5.804559 | 0.174293  |
| 19                     | 1             | 0           | -11.234830              | -5.398894 | -1.061308 |
| 20                     | 7             | 0           | -6.664561               | -4.786477 | 0.145300  |
| 21                     | 7             | 0           | -9.410877               | -4.570598 | -0.528911 |
| 22                     | 7             | 0           | -2.911829               | 1.111943  | -0.114860 |
| 23                     | 7             | 0           | -3.010638               | -1.269591 | -0.010460 |
| 24                     | 7             | 0           | -5.024019               | 0.005758  | -0.074216 |
| 25                     | 6             | 0           | -0.849971               | -0.165472 | -0.044493 |
| 26                     | 6             | 0           | 1.308545                | 0.908476  | -0.041192 |
| 27                     | 6             | 0           | -0.191270               | -1.401405 | -0.013987 |
| 28                     | 1             | 0           | 1.930270                | 1.793131  | -0.052211 |
| 29                     | 6             | 0           | 1.205393                | -1.441367 | -0.000260 |
| 30                     | 1             | 0           | -0.781972               | -2.308265 | 0.001394  |
| 31                     | 6             | 0           | -6.950376               | 3.774056  | -0.250231 |
| 32                     | 6             | 0           | -4.952152               | 2.432671  | -0.191810 |
| 33                     | 1             | 0           | -8.031143               | 3.872858  | -0.253844 |
| 34                     | 6             | 0           | -4.212061               | 3.623547  | -0.256904 |
| 35                     | 6             | 0           | -4.889517               | 4.853928  | -0.315474 |
| 36                     | 1             | 0           | -3.129876               | 3.579819  | -0.238751 |
| 37                     | 6             | 0           | 1.988637                | -2.683656 | 0.031493  |

|    |    |   |            |           |           |
|----|----|---|------------|-----------|-----------|
| 38 | 6  | 0 | 1.427001   | -3.966505 | 0.002544  |
| 39 | 6  | 0 | 4.155526   | -3.594019 | 0.119016  |
| 40 | 6  | 0 | 2.264384   | -5.085904 | 0.033998  |
| 41 | 1  | 0 | 0.353429   | -4.096528 | -0.045875 |
| 42 | 6  | 0 | 3.652148   | -4.895452 | 0.093613  |
| 43 | 1  | 0 | 5.219533   | -3.405828 | 0.167632  |
| 44 | 1  | 0 | 1.842744   | -6.084252 | 0.011992  |
| 45 | 1  | 0 | 4.337084   | -5.734329 | 0.119409  |
| 46 | 6  | 0 | -4.131393  | 6.132393  | -0.390364 |
| 47 | 6  | 0 | -2.932271  | 6.213938  | -1.124305 |
| 48 | 6  | 0 | -2.244147  | 7.433423  | -1.175809 |
| 49 | 1  | 0 | -2.557945  | 5.351655  | -1.664984 |
| 50 | 6  | 0 | -3.968350  | 8.373130  | 0.217241  |
| 51 | 6  | 0 | -2.769000  | 8.538992  | -0.491749 |
| 52 | 1  | 0 | -1.323576  | 7.518876  | -1.743745 |
| 53 | 1  | 0 | -4.406797  | 9.202842  | 0.763621  |
| 54 | 1  | 0 | -2.270601  | 9.501789  | -0.504629 |
| 55 | 7  | 0 | 3.346464   | -2.506973 | 0.090444  |
| 56 | 7  | 0 | -6.246391  | 4.925198  | -0.312192 |
| 57 | 1  | 0 | -11.435000 | -1.785713 | 1.290948  |
| 58 | 7  | 0 | 1.949429   | -0.287601 | -0.013178 |
| 59 | 6  | 0 | 4.858407   | 3.332686  | 1.677545  |
| 60 | 6  | 0 | 4.505544   | 1.994099  | 1.462013  |
| 61 | 6  | 0 | 4.793213   | 2.256954  | -0.858358 |
| 62 | 6  | 0 | 5.149724   | 3.597245  | -0.703271 |
| 63 | 6  | 0 | 5.184493   | 4.144788  | 0.586781  |
| 64 | 1  | 0 | 4.881912   | 3.741058  | 2.679780  |
| 65 | 1  | 0 | 4.752431   | 1.798754  | -1.837201 |
| 66 | 1  | 0 | 5.393916   | 4.190281  | -1.576317 |
| 67 | 1  | 0 | 5.459464   | 5.181973  | 0.740956  |
| 68 | 6  | 0 | 4.143411   | 1.055431  | 2.533994  |
| 69 | 6  | 0 | 4.067986   | 1.403850  | 3.888855  |
| 70 | 6  | 0 | 3.523304   | -1.158943 | 3.034469  |
| 71 | 6  | 0 | 3.710644   | 0.434961  | 4.831751  |
| 72 | 1  | 0 | 4.281156   | 2.415417  | 4.210406  |
| 73 | 6  | 0 | 3.433882   | -0.868639 | 4.396596  |
| 74 | 1  | 0 | 3.320165   | -2.153291 | 2.659968  |
| 75 | 1  | 0 | 3.649112   | 0.692787  | 5.882897  |
| 76 | 1  | 0 | 3.153048   | -1.649594 | 5.092793  |
| 77 | 7  | 0 | 3.872009   | -0.222658 | 2.118399  |
| 78 | 7  | 0 | 4.476327   | 1.467275  | 0.196657  |
| 79 | 44 | 0 | 3.989977   | -0.541601 | 0.074869  |

|     |   |   |           |           |           |
|-----|---|---|-----------|-----------|-----------|
| 80  | 6 | 0 | 6.559166  | -1.115946 | -1.224857 |
| 81  | 7 | 0 | 6.018433  | -0.957051 | 0.024869  |
| 82  | 6 | 0 | 7.927793  | -1.363674 | -1.391995 |
| 83  | 1 | 0 | 8.348366  | -1.485457 | -2.381959 |
| 84  | 6 | 0 | 8.755227  | -1.452990 | -0.268241 |
| 85  | 1 | 0 | 9.815877  | -1.644161 | -0.384757 |
| 86  | 6 | 0 | 8.191963  | -1.293800 | 1.005610  |
| 87  | 1 | 0 | 8.795456  | -1.358046 | 1.902907  |
| 88  | 6 | 0 | 6.822677  | -1.046136 | 1.112362  |
| 89  | 1 | 0 | 6.350347  | -0.921583 | 2.077367  |
| 90  | 6 | 0 | 5.600501  | -1.010702 | -2.334183 |
| 91  | 6 | 0 | 5.939656  | -1.180461 | -3.682950 |
| 92  | 6 | 0 | 4.949201  | -1.064512 | -4.663345 |
| 93  | 1 | 0 | 6.959557  | -1.401664 | -3.970956 |
| 94  | 6 | 0 | 3.352821  | -0.623338 | -2.913270 |
| 95  | 6 | 0 | 3.633306  | -0.781357 | -4.271054 |
| 96  | 1 | 0 | 5.199531  | -1.192924 | -5.710251 |
| 97  | 1 | 0 | 2.351083  | -0.400764 | -2.571169 |
| 98  | 1 | 0 | 2.835321  | -0.683734 | -4.997147 |
| 99  | 7 | 0 | 4.311243  | -0.731656 | -1.960764 |
| 100 | 7 | 0 | -4.640475 | 7.202781  | 0.272232  |
| 101 | 6 | 0 | -6.354493 | 2.508521  | -0.189544 |
| 102 | 1 | 0 | -6.956356 | 1.609549  | -0.141546 |
| 103 | 6 | 0 | -0.079629 | 1.009150  | -0.060133 |
| 104 | 1 | 0 | -0.558101 | 1.980013  | -0.084170 |

**Table S2.** MO composition of RuL in ( $S=0$ ) ground state in  $\alpha$ -spin.

| MO          | Energy (eV)   | Composition |                |           |
|-------------|---------------|-------------|----------------|-----------|
|             |               | Ruthenium   | 2,2'-bipyridyl | L1        |
| LUMO+5      | -2.074        | 0           | 8              | 92        |
| LUMO+4      | -2.500        | 3           | 4              | 94        |
| LUMO+3      | -2.608        | 6           | 92             | 2         |
| LUMO+2      | -2.712        | 2           | 95             | 4         |
| LUMO+1      | -3.091        | 0           | 0              | 100       |
| <b>LUMO</b> | <b>-3.311</b> | <b>4</b>    | <b>2</b>       | <b>94</b> |
| <b>HOMO</b> | <b>-6.527</b> | <b>76</b>   | <b>15</b>      | <b>9</b>  |
| HOMO-1      | -6.694        | 73          | 17             | 10        |
| HOMO-2      | -6.705        | 73          | 17             | 10        |
| HOMO-3      | -7.108        | 0           | 0              | 100       |
| HOMO-4      | -7.116        | 0           | 0              | 100       |
| HOMO-5      | -7.336        | 0           | 0              | 100       |

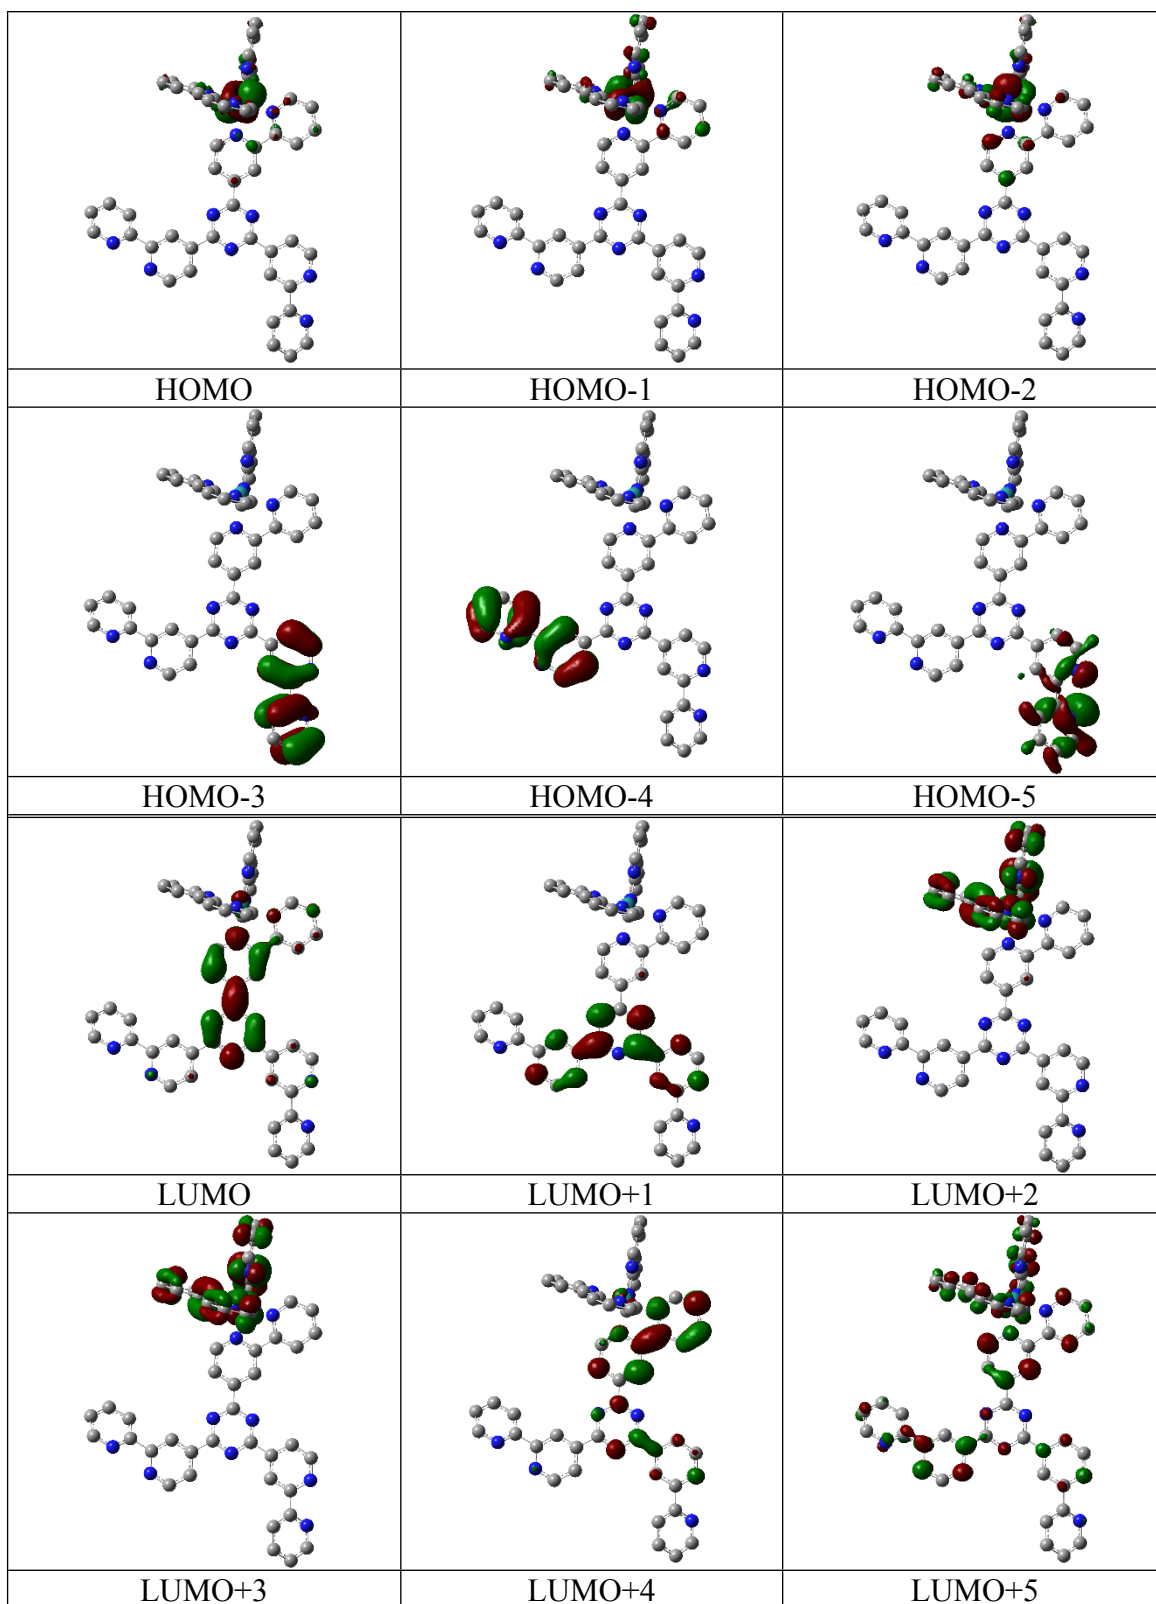

**Figure S19.** Kohn-Sham molecular orbital diagrams of **RuL** in ( $S=0$ ) ground state.

**Table S3.** Total energy values for the optimized structure of the first, second and third reduction on complex **RuL** (uPBE0, LANL2DZ, CPCM: Acetonitrile).

| RuL                       | S   | 2S+1 | Total Energy   |                  |             | Experimental |
|---------------------------|-----|------|----------------|------------------|-------------|--------------|
|                           |     |      | a. u.          | eV               | $\Delta$ eV | eV           |
| Neutral                   | 0   | 1    | -2843.83755154 | -77384.790161925 | -           | -            |
| 1 <sup>st</sup> reduction | 1/2 | 2    | -2843.97322085 | -77388.481904827 | 3.69        | 3.55         |
| 2 <sup>nd</sup> reduction | 1   | 3    | -2844.07905828 | -77391.361884978 | 2.88        | 3.05         |
| 3 <sup>rd</sup> reduction | 3/2 | 4    | -2844.18196269 | -77394.162057642 | 2.80        | 2.90         |

**Table S4.** Spin contamination monitoring for the DFT calculation of **RuL** reduced species.

| RuL                       | S   | 2S+1 | S**2                |                    |          |
|---------------------------|-----|------|---------------------|--------------------|----------|
|                           |     |      | Before annihilation | After annihilation | % change |
| 1 <sup>st</sup> reduction | 1/2 | 2    | 0.7643              | 0.7501             | 2        |
| 2 <sup>nd</sup> reduction | 1   | 3    | 2.0257              | 2.0004             | 1        |
| 3 <sup>rd</sup> reduction | 3/2 | 4    | 3.7888              | 3.7508             | 1        |

**Table S5.** Mulliken spin density values for each of the reduced **RuL** species.

| RuL                       | Mulliken spin density |             |                                        |
|---------------------------|-----------------------|-------------|----------------------------------------|
|                           | Ruthenium             | 2,2'-bpy    | tris-4-(2,2'-bpy)-1'',3'',5''-triazine |
| 1 <sup>st</sup> reduction | 0.036 (4%)            | 0.012 (1%)  | 0.952 (95%)                            |
| 2 <sup>nd</sup> reduction | 0.000 (0%)            | 0.004 (0%)  | 0.996 (100%)                           |
| 3 <sup>rd</sup> reduction | 0.036 (4%)            | 0.914 (91%) | 0.050 (5%)                             |

**Table S6.** Atomic coordinates for DFT optimization of **Ru<sub>2</sub>L** in ( $S=0$ ) PBE0/LANL2DZ CPCM: CH<sub>3</sub>CN.

| Standard orientation : |               |             |                         |           |           |  |
|------------------------|---------------|-------------|-------------------------|-----------|-----------|--|
| Center Number          | Atomic Number | Atomic Type | Coordinates (Angstroms) |           |           |  |
|                        |               |             | X                       | Y         | Z         |  |
| 1                      | 6             | 0           | -4.927792               | 1.365666  | -0.070408 |  |
| 2                      | 6             | 0           | -6.202607               | -3.301013 | -1.339476 |  |
| 3                      | 6             | 0           | -9.392080               | -1.468011 | 1.408110  |  |
| 4                      | 6             | 0           | -6.218415               | 2.066837  | -0.087131 |  |
| 5                      | 6             | 0           | -6.389248               | -2.346867 | -2.442137 |  |
| 6                      | 6             | 0           | -8.465410               | -1.039406 | 2.465506  |  |
| 7                      | 6             | 0           | -5.875231               | -4.651350 | -1.518177 |  |
| 8                      | 6             | 0           | -6.221708               | -2.669834 | -3.795001 |  |
| 9                      | 6             | 0           | -10.699792              | -1.911218 | 1.644227  |  |
| 10                     | 6             | 0           | -8.799724               | -0.982812 | 3.824814  |  |



|    |   |   |            |           |           |
|----|---|---|------------|-----------|-----------|
| 11 | 6 | 0 | -3.689397  | 2.011468  | -0.103422 |
| 12 | 6 | 0 | -6.354060  | 3.460844  | -0.097042 |
| 13 | 6 | 0 | -2.510402  | 1.254899  | -0.088420 |
| 14 | 6 | 0 | -5.714398  | -5.475986 | -0.400297 |
| 15 | 6 | 0 | -7.844489  | -0.557215 | 4.753174  |
| 16 | 6 | 0 | -11.503634 | -2.295272 | 0.566253  |
| 17 | 6 | 0 | -6.419352  | -1.685800 | -4.768782 |
| 18 | 6 | 0 | -7.631924  | 4.028443  | -0.116363 |
| 19 | 6 | 0 | -2.608089  | -0.145689 | -0.042428 |
| 20 | 6 | 0 | -5.884072  | -4.928549 | 0.879126  |
| 21 | 6 | 0 | -6.568746  | -0.194501 | 4.298818  |
| 22 | 6 | 0 | -10.978712 | -2.227169 | -0.731840 |
| 23 | 6 | 0 | -8.750801  | 3.183730  | -0.125574 |
| 24 | 6 | 0 | -6.781093  | -0.392570 | -4.365760 |
| 25 | 6 | 0 | -3.869131  | -0.734650 | -0.012941 |
| 26 | 6 | 0 | -6.212579  | -3.577336 | 0.997356  |
| 27 | 6 | 0 | -9.668287  | -1.780365 | -0.907479 |
| 28 | 6 | 0 | -8.555340  | 1.801813  | -0.112593 |
| 29 | 6 | 0 | -6.932823  | -0.127192 | -3.004126 |
| 30 | 6 | 0 | -6.292108  | -0.268535 | 2.933033  |
| 31 | 6 | 0 | 0.047929   | 3.861176  | -0.198927 |
| 32 | 1 | 0 | -5.461673  | -6.522679 | -0.525533 |
| 33 | 1 | 0 | -8.091310  | -0.509233 | 5.807652  |
| 34 | 1 | 0 | -12.517215 | -2.639961 | 0.736374  |
| 35 | 6 | 0 | -1.195960  | 1.925305  | -0.119725 |
| 36 | 1 | 0 | -6.293713  | -1.923794 | -5.818894 |
| 37 | 6 | 0 | 1.099321   | 1.814515  | -0.123254 |
| 38 | 1 | 0 | -5.747904  | -5.060187 | -2.512438 |
| 39 | 1 | 0 | -5.939928  | -3.672337 | -4.090945 |
| 40 | 1 | 0 | -11.090677 | -1.960364 | 2.652483  |
| 41 | 1 | 0 | -9.790191  | -1.262739 | 4.160433  |
| 42 | 1 | 0 | -3.616769  | 3.090591  | -0.141856 |
| 43 | 1 | 0 | -5.480151  | 4.099727  | -0.088340 |
| 44 | 1 | 0 | -1.716867  | -0.760194 | -0.030217 |
| 45 | 1 | 0 | -5.767262  | -5.530773 | 1.771972  |
| 46 | 1 | 0 | -5.799070  | 0.141228  | 4.983187  |
| 47 | 1 | 0 | -11.566457 | -2.513762 | -1.595506 |
| 48 | 1 | 0 | -9.758446  | 3.580996  | -0.141296 |
| 49 | 1 | 0 | -6.943848  | 0.399489  | -5.086625 |
| 50 | 1 | 0 | -3.981075  | -1.809302 | 0.025645  |
| 51 | 1 | 0 | -6.349848  | -3.117171 | 1.966622  |
| 52 | 1 | 0 | -5.319065  | 0.000556  | 2.544552  |

|    |    |   |           |           |           |
|----|----|---|-----------|-----------|-----------|
| 53 | 1  | 0 | -9.228512 | -1.710414 | -1.893080 |
| 54 | 1  | 0 | -9.393385 | 1.117962  | -0.121096 |
| 55 | 1  | 0 | -7.214483 | 0.856816  | -2.653780 |
| 56 | 7  | 0 | -5.012658 | -0.003785 | -0.023341 |
| 57 | 7  | 0 | -6.370098 | -2.775598 | -0.084282 |
| 58 | 7  | 0 | -8.887159 | -1.406544 | 0.135173  |
| 59 | 7  | 0 | -7.318081 | 1.248610  | -0.094461 |
| 60 | 7  | 0 | -6.744898 | -1.079738 | -2.058052 |
| 61 | 7  | 0 | -7.214968 | -0.683230 | 2.030982  |
| 62 | 7  | 0 | 1.207437  | 3.161276  | -0.176880 |
| 63 | 44 | 0 | -6.918082 | -0.780141 | -0.017126 |
| 64 | 7  | 0 | -0.083072 | 1.155786  | -0.095826 |
| 65 | 7  | 0 | -1.173130 | 3.276801  | -0.169195 |
| 66 | 6  | 0 | 2.342516  | 1.020071  | -0.086302 |
| 67 | 6  | 0 | 4.748266  | 0.870113  | -0.055248 |
| 68 | 6  | 0 | 2.293558  | -0.378723 | -0.026795 |
| 69 | 1  | 0 | 5.729321  | 1.324251  | -0.069681 |
| 70 | 6  | 0 | 3.482906  | -1.111634 | 0.017958  |
| 71 | 1  | 0 | 1.328346  | -0.868593 | -0.012112 |
| 72 | 6  | 0 | -0.927348 | 7.502697  | -0.301057 |
| 73 | 6  | 0 | 0.117935  | 5.334510  | -0.259876 |
| 74 | 1  | 0 | -1.809404 | 8.134935  | -0.296795 |
| 75 | 6  | 0 | 1.358782  | 5.987278  | -0.325690 |
| 76 | 6  | 0 | 1.396497  | 7.391834  | -0.376800 |
| 77 | 1  | 0 | 2.270636  | 5.402602  | -0.314323 |
| 78 | 6  | 0 | 3.540762  | -2.577839 | 0.087234  |
| 79 | 6  | 0 | 2.414305  | -3.409865 | 0.064186  |
| 80 | 6  | 0 | 4.961888  | -4.444779 | 0.252989  |
| 81 | 6  | 0 | 2.580024  | -4.796221 | 0.139387  |
| 82 | 1  | 0 | 1.420207  | -2.988393 | -0.012127 |
| 83 | 6  | 0 | 3.876180  | -5.321618 | 0.237286  |
| 84 | 1  | 0 | 5.976538  | -4.811068 | 0.330939  |
| 85 | 1  | 0 | 1.716592  | -5.451358 | 0.122563  |
| 86 | 1  | 0 | 4.050303  | -6.389000 | 0.299298  |
| 87 | 6  | 0 | 2.696823  | 8.111636  | -0.453015 |
| 88 | 6  | 0 | 3.771443  | 7.576840  | -1.189440 |
| 89 | 6  | 0 | 4.982681  | 8.279497  | -1.238698 |
| 90 | 1  | 0 | 3.657163  | 6.645571  | -1.733069 |
| 91 | 6  | 0 | 3.972557  | 9.959507  | 0.159076  |
| 92 | 6  | 0 | 5.090705  | 9.496314  | -0.550789 |
| 93 | 1  | 0 | 5.819548  | 7.888445  | -1.807924 |
| 94 | 1  | 0 | 4.014844  | 10.895685 | 0.707644  |

|     |    |   |           |           |           |
|-----|----|---|-----------|-----------|-----------|
| 95  | 1  | 0 | 6.008512  | 10.073395 | -0.561625 |
| 96  | 7  | 0 | 4.804635  | -3.100538 | 0.179519  |
| 97  | 7  | 0 | 0.262114  | 8.139484  | -0.363948 |
| 98  | 1  | 0 | -7.751126 | 5.105802  | -0.124098 |
| 99  | 7  | 0 | 4.704331  | -0.484952 | 0.006196  |
| 100 | 6  | 0 | 8.999522  | 1.249138  | 1.717897  |
| 101 | 6  | 0 | 8.033854  | 0.255610  | 1.510824  |
| 102 | 6  | 0 | 8.448198  | 0.286970  | -0.804882 |
| 103 | 6  | 0 | 9.418558  | 1.279274  | -0.658351 |
| 104 | 6  | 0 | 9.700517  | 1.768326  | 0.624911  |
| 105 | 1  | 0 | 9.207035  | 1.614852  | 2.715496  |
| 106 | 1  | 0 | 8.201008  | -0.114791 | -1.778210 |
| 107 | 1  | 0 | 9.937175  | 1.653344  | -1.532774 |
| 108 | 1  | 0 | 10.450115 | 2.537450  | 0.772158  |
| 109 | 6  | 0 | 7.240610  | -0.356489 | 2.586432  |
| 110 | 6  | 0 | 7.332927  | 0.012602  | 3.934670  |
| 111 | 6  | 0 | 5.604160  | -1.966089 | 3.103576  |
| 112 | 6  | 0 | 6.534421  | -0.633892 | 4.883239  |
| 113 | 1  | 0 | 8.015304  | 0.793382  | 4.245726  |
| 114 | 6  | 0 | 5.656306  | -1.641511 | 4.459865  |
| 115 | 1  | 0 | 4.942691  | -2.740460 | 2.739078  |
| 116 | 1  | 0 | 6.597108  | -0.357505 | 5.929568  |
| 117 | 1  | 0 | 5.021253  | -2.169377 | 5.160975  |
| 118 | 7  | 0 | 6.376964  | -1.341253 | 2.181692  |
| 119 | 7  | 0 | 7.766284  | -0.217395 | 0.252269  |
| 120 | 44 | 0 | 6.345103  | -1.719822 | 0.145805  |
| 121 | 6  | 0 | 8.294468  | -3.535691 | -1.089388 |
| 122 | 7  | 0 | 7.898560  | -3.090534 | 0.145292  |
| 123 | 6  | 0 | 9.358542  | -4.436868 | -1.224428 |
| 124 | 1  | 0 | 9.667430  | -4.780831 | -2.203349 |
| 125 | 6  | 0 | 10.026246 | -4.892038 | -0.083209 |
| 126 | 1  | 0 | 10.851148 | -5.589374 | -0.174770 |
| 127 | 6  | 0 | 9.612485  | -4.432960 | 1.175103  |
| 128 | 1  | 0 | 10.100777 | -4.760100 | 2.085083  |
| 129 | 6  | 0 | 8.548588  | -3.532909 | 1.249455  |
| 130 | 1  | 0 | 8.199400  | -3.157462 | 2.201794  |
| 131 | 6  | 0 | 7.524611  | -2.997699 | -2.219896 |
| 132 | 6  | 0 | 7.740818  | -3.356993 | -3.556713 |
| 133 | 6  | 0 | 6.952853  | -2.785964 | -4.560924 |
| 134 | 1  | 0 | 8.510292  | -4.072900 | -3.816305 |
| 135 | 6  | 0 | 5.788023  | -1.543757 | -2.856122 |
| 136 | 6  | 0 | 5.960359  | -1.862576 | -4.203683 |

|     |   |   |           |           |           |
|-----|---|---|-----------|-----------|-----------|
| 137 | 1 | 0 | 7.110585  | -3.055903 | -5.598904 |
| 138 | 1 | 0 | 5.036115  | -0.832241 | -2.542711 |
| 139 | 1 | 0 | 5.328305  | -1.394867 | -4.948846 |
| 140 | 7 | 0 | 6.550262  | -2.095094 | -1.880126 |
| 141 | 7 | 0 | 2.800145  | 9.290890  | 0.212155  |
| 142 | 6 | 0 | -1.053432 | 6.109425  | -0.248757 |
| 143 | 1 | 0 | -2.027460 | 5.638820  | -0.199491 |
| 144 | 6 | 0 | 3.597528  | 1.651130  | -0.103771 |
| 145 | 1 | 0 | 3.669591  | 2.730244  | -0.150804 |

**Table S7.** MO composition of **Ru<sub>2</sub>L** in (*S*=0) ground state in  $\alpha$ -spin.

| MO          | Energy (eV)   | Composition |                |           |
|-------------|---------------|-------------|----------------|-----------|
|             |               | Ruthenium   | 2,2'-bipyridyl | L1        |
| LUMO+5      | -2.664        | 6           | 92             | 2         |
| LUMO+4      | -2.692        | 5           | 26             | 69        |
| LUMO+3      | -2.764        | 2           | 96             | 3         |
| LUMO+2      | -2.786        | 0           | 73             | 26        |
| LUMO+1      | -3.355        | 3           | 2              | 96        |
| <b>LUMO</b> | <b>-3.492</b> | <b>5</b>    | <b>3</b>       | <b>93</b> |
| <b>HOMO</b> | <b>-6.589</b> | <b>76</b>   | <b>15</b>      | <b>8</b>  |
| HOMO-1      | -6.754        | 76          | 15             | 9         |
| HOMO-2      | -6.756        | 73          | 17             | 9         |
| HOMO-3      | -6.766        | 73          | 17             | 9         |
| HOMO-4      | -6.772        | 73          | 17             | 10        |
| HOMO-5      | -7.175        | 72          | 16             | 11        |

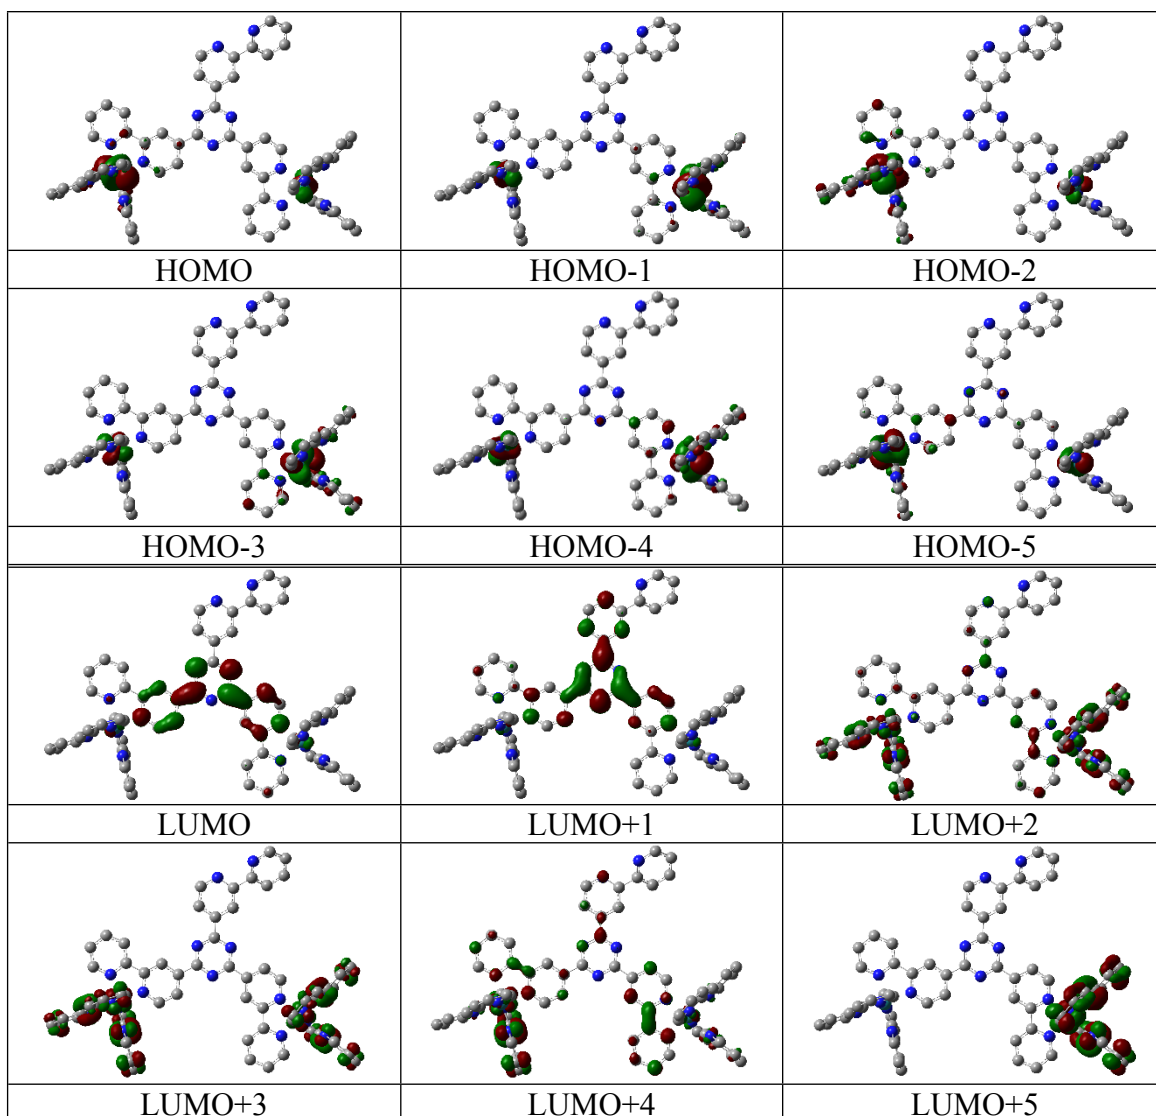

**Figure S20.** Kohn-Sham molecular orbital diagrams of  $\text{Ru}_2\text{L}$  in ( $S=0$ ) ground state.

**Table S8.** Total energy values for the optimized structure of the first, second and third reduction on complex  $\text{Ru}_2\text{L}$  (uPBE0, LANL2DZ, CPCM: Acetonitrile).

| $\text{Ru}_2\text{L}$     | S   | 2S+1 | Total Energy   |                  |                   | Experimental<br>eV |
|---------------------------|-----|------|----------------|------------------|-------------------|--------------------|
|                           |     |      | a. u.          | eV               | $\Delta\text{eV}$ |                    |
| Neutral                   | 0   | 1    | -3927,07362710 | -106861,15610299 | -                 | -                  |
| 1 <sup>st</sup> reduction | 1/2 | 2    | -3927,21481519 | -106864,99802559 | 3.84              | 3.64               |
| 2 <sup>nd</sup> reduction | 1   | 3    | -3927,33505555 | -106868,26993883 | 3.27              | 3.25               |
| 3 <sup>rd</sup> reduction | 1/2 | 2    | -3927,43457354 | -106870,97796227 | 2.94              | 3.00               |

**Table S9.** Spin contamination monitoring for the DFT calculation of **Ru<sub>2</sub>L** reduced species.

| Ru <sub>2</sub> L         | S   | 2S+1 | S**2                |                    |          |
|---------------------------|-----|------|---------------------|--------------------|----------|
|                           |     |      | Before annihilation | After annihilation | % change |
| 1 <sup>st</sup> reduction | 1/2 | 2    | 0.7652              | 0.7502             | 2        |
| 2 <sup>nd</sup> reduction | 1   | 3    | 2.0251              | 2.0004             | 1        |
| 3 <sup>rd</sup> reduction | 1/2 | 2    | 0.7632              | 0.7501             | 2        |

**Table S10.** Mulliken spin density values for each of the reduced **Ru<sub>2</sub>L** species.

| Ru <sub>2</sub> L         | Mulliken spin density |             |                                        |
|---------------------------|-----------------------|-------------|----------------------------------------|
|                           | Ruthenium             | 2,2'-bpy    | tris-4-(2,2'-bpy)-1'',3'',5''-triazine |
| 1 <sup>st</sup> reduction | 0.044 (4%)            | 0.012 (1%)  | 0.944 (94%)                            |
| 2 <sup>nd</sup> reduction | 0.033 (3%)            | 0.033 (3%)  | 0.934 (93%)                            |
| 3 <sup>rd</sup> reduction | 0.018 (2%)            | 0.863 (86%) | 0.119 (12%)                            |

**Table S11.** Atomic coordinates for DFT optimization of **Ru<sub>3</sub>L** in (*S*=0) PBE0/LANL2DZ CPCM: CH<sub>3</sub>CN.

| Standard orientation : |               |             |                         |          |           |  |
|------------------------|---------------|-------------|-------------------------|----------|-----------|--|
| Center Number          | Atomic Number | Atomic Type | Coordinates (Angstroms) |          |           |  |
|                        |               |             | X                       | Y        | Z         |  |
| 1                      | 6             | 0           | -3.246061               | 3.872933 | -0.049003 |  |
| 2                      | 6             | 0           | -7.940807               | 2.881238 | -1.432467 |  |
| 3                      | 6             | 0           | -7.833579               | 6.594917 | 1.270867  |  |
| 4                      | 6             | 0           | -3.201522               | 5.340950 | -0.083743 |  |
| 5                      | 6             | 0           | -7.139345               | 3.462519 | -2.519122 |  |
| 6                      | 6             | 0           | -7.067607               | 5.972398 | 2.359956  |  |
| 7                      | 6             | 0           | -8.990010               | 1.974622 | -1.631681 |  |
| 8                      | 6             | 0           | -7.307985               | 3.145271 | -3.873118 |  |
| 9                      | 6             | 0           | -8.825110               | 7.565105 | 1.465757  |  |
| 10                     | 6             | 0           | -7.214415               | 6.308012 | 3.712155  |  |
| 11                     | 6             | 0           | -2.110921               | 3.057892 | -0.045192 |  |
| 12                     | 6             | 0           | -2.019151               | 6.092110 | -0.076674 |  |
| 13                     | 6             | 0           | -2.256104               | 1.664731 | -0.015025 |  |
| 14                     | 6             | 0           | -9.692554               | 1.479293 | -0.528536 |  |
| 15                     | 6             | 0           | -6.434717               | 5.657316 | 4.673450  |  |
| 16                     | 6             | 0           | -9.496077               | 8.097445 | 0.360347  |  |
| 17                     | 6             | 0           | -6.491995               | 3.754720 | -4.831415 |  |
| 18                     | 6             | 0           | -2.089742               | 7.488140 | -0.114005 |  |
| 19                     | 6             | 0           | -3.551699               | 1.121796 | 0.009451  |  |
| 20                     | 6             | 0           | -9.328013               | 1.904405 | 0.756781  |  |

|    |   |   |            |           |           |
|----|---|---|------------|-----------|-----------|
| 21 | 6 | 0 | -5.519424  | 4.679693  | 4.258586  |
| 22 | 6 | 0 | -9.158338  | 7.644902  | -0.922847 |
| 23 | 6 | 0 | -3.348217  | 8.104467  | -0.157608 |
| 24 | 6 | 0 | -5.518782  | 4.672758  | -4.412046 |
| 25 | 6 | 0 | -4.645419  | 1.982180  | 0.004080  |
| 26 | 6 | 0 | -8.275775  | 2.810715  | 0.895375  |
| 27 | 6 | 0 | -8.164197  | 6.674784  | -1.057170 |
| 28 | 6 | 0 | -4.492716  | 7.305641  | -0.160257 |
| 29 | 6 | 0 | -5.394309  | 4.949680  | -3.049874 |
| 30 | 6 | 0 | -5.414415  | 4.387209  | 2.898135  |
| 31 | 6 | 0 | 1.216850   | 0.532014  | -0.018677 |
| 32 | 1 | 0 | -10.506669 | 0.777556  | -0.669721 |
| 33 | 1 | 0 | -6.539612  | 5.908301  | 5.722818  |
| 34 | 1 | 0 | -10.265161 | 8.848854  | 0.497990  |
| 35 | 6 | 0 | -1.068985  | 0.789141  | -0.008402 |
| 36 | 1 | 0 | -6.613727  | 3.518075  | -5.882324 |
| 37 | 6 | 0 | -0.148565  | -1.318691 | 0.016808  |
| 38 | 1 | 0 | -9.261221  | 1.657556  | -2.630659 |
| 39 | 1 | 0 | -8.062722  | 2.433234  | -4.181899 |
| 40 | 1 | 0 | -9.075711  | 7.903283  | 2.463104  |
| 41 | 1 | 0 | -7.924025  | 7.066661  | 4.017015  |
| 42 | 1 | 0 | -1.114684  | 3.480255  | -0.066665 |
| 43 | 1 | 0 | -1.054569  | 5.601849  | -0.040853 |
| 44 | 1 | 0 | -3.699681  | 0.049548  | 0.032634  |
| 45 | 1 | 0 | -9.845192  | 1.546333  | 1.638760  |
| 46 | 1 | 0 | -4.896072  | 4.150732  | 4.969320  |
| 47 | 1 | 0 | -9.651902  | 8.030733  | -1.806601 |
| 48 | 1 | 0 | -3.448997  | 9.182647  | -0.187756 |
| 49 | 1 | 0 | -4.866057  | 5.168108  | -5.120672 |
| 50 | 1 | 0 | -5.655829  | 1.598063  | 0.027054  |
| 51 | 1 | 0 | -7.963782  | 3.160642  | 1.870297  |
| 52 | 1 | 0 | -4.722873  | 3.636549  | 2.539660  |
| 53 | 1 | 0 | -7.874544  | 6.303269  | -2.030773 |
| 54 | 1 | 0 | -5.481019  | 7.743697  | -0.195342 |
| 55 | 1 | 0 | -4.658735  | 5.654764  | -2.686519 |
| 56 | 7 | 0 | -4.508001  | 3.332237  | -0.022359 |
| 57 | 7 | 0 | -7.591777  | 3.291310  | -0.171676 |
| 58 | 7 | 0 | -7.511315  | 6.157408  | 0.012250  |
| 59 | 7 | 0 | -4.427749  | 5.952248  | -0.125642 |
| 60 | 7 | 0 | -6.185647  | 4.362513  | -2.119071 |
| 61 | 7 | 0 | -6.170353  | 5.014645  | 1.964050  |
| 62 | 7 | 0 | 1.107915   | -0.817117 | 0.001662  |

|     |    |   |           |           |           |
|-----|----|---|-----------|-----------|-----------|
| 63  | 44 | 0 | -6.059651 | 4.681566  | -0.077076 |
| 64  | 7  | 0 | -1.262709 | -0.549768 | 0.012057  |
| 65  | 7  | 0 | 0.154020  | 1.369318  | -0.024606 |
| 66  | 6  | 0 | -0.313256 | -2.784387 | 0.035721  |
| 67  | 6  | 0 | 0.607378  | -5.011999 | 0.061290  |
| 68  | 6  | 0 | -1.592625 | -3.355226 | 0.043265  |
| 69  | 1  | 0 | 1.445912  | -5.694600 | 0.064660  |
| 70  | 6  | 0 | -1.730486 | -4.745701 | 0.057445  |
| 71  | 1  | 0 | -2.457071 | -2.704037 | 0.038625  |
| 72  | 6  | 0 | 4.039850  | 3.030414  | -0.074798 |
| 73  | 6  | 0 | 2.568956  | 1.121345  | -0.036326 |
| 74  | 1  | 0 | 4.214236  | 4.097220  | -0.095287 |
| 75  | 6  | 0 | 3.702258  | 0.297742  | -0.032676 |
| 76  | 6  | 0 | 4.976075  | 0.871769  | -0.052740 |
| 77  | 1  | 0 | 3.569206  | -0.776199 | -0.013170 |
| 78  | 6  | 0 | -3.024331 | -5.440945 | 0.067172  |
| 79  | 6  | 0 | -4.265308 | -4.792862 | 0.022543  |
| 80  | 6  | 0 | -4.081621 | -7.540811 | 0.138856  |
| 81  | 6  | 0 | -5.439569 | -5.551943 | 0.038549  |
| 82  | 1  | 0 | -4.322074 | -3.712715 | -0.025253 |
| 83  | 6  | 0 | -5.345142 | -6.949400 | 0.098658  |
| 84  | 1  | 0 | -3.967807 | -8.615268 | 0.188720  |
| 85  | 1  | 0 | -6.406614 | -5.063362 | 0.004962  |
| 86  | 1  | 0 | -6.228995 | -7.575554 | 0.113541  |
| 87  | 6  | 0 | 6.224791  | 0.098059  | -0.048739 |
| 88  | 6  | 0 | 6.282172  | -1.301345 | -0.067849 |
| 89  | 6  | 0 | 7.526017  | -1.940014 | -0.059442 |
| 90  | 1  | 0 | 5.374021  | -1.890200 | -0.090646 |
| 91  | 6  | 0 | 8.573006  | 0.230735  | -0.017026 |
| 92  | 6  | 0 | 8.690565  | -1.159884 | -0.032232 |
| 93  | 1  | 0 | 7.584779  | -3.022321 | -0.073660 |
| 94  | 1  | 0 | 9.448458  | 0.865456  | 0.006931  |
| 95  | 1  | 0 | 9.674425  | -1.613110 | -0.023972 |
| 96  | 7  | 0 | -2.941561 | -6.807918 | 0.124641  |
| 97  | 7  | 0 | 5.139567  | 2.234929  | -0.074541 |
| 98  | 1  | 0 | -1.182582 | 8.081530  | -0.108982 |
| 99  | 7  | 0 | -0.630877 | -5.568165 | 0.066008  |
| 100 | 6  | 0 | 2.745449  | -8.739701 | 1.803339  |
| 101 | 6  | 0 | 1.439599  | -8.292261 | 1.564139  |
| 102 | 6  | 0 | 1.731573  | -8.572535 | -0.753691 |
| 103 | 6  | 0 | 3.040266  | -9.022977 | -0.574893 |
| 104 | 6  | 0 | 3.556322  | -9.109443 | 0.725692  |



|     |    |   |           |            |           |
|-----|----|---|-----------|------------|-----------|
| 105 | 1  | 0 | 3.129587  | -8.803207  | 2.813459  |
| 106 | 1  | 0 | 1.299139  | -8.488516  | -1.741581 |
| 107 | 1  | 0 | 3.633680  | -9.298666  | -1.438219 |
| 108 | 1  | 0 | 4.568261  | -9.457804  | 0.898086  |
| 109 | 6  | 0 | 0.504991  | -7.880027  | 2.621315  |
| 110 | 6  | 0 | 0.825879  | -7.851663  | 3.984739  |
| 111 | 6  | 0 | -1.672485 | -7.115806  | 3.083630  |
| 112 | 6  | 0 | -0.137898 | -7.443344  | 4.912127  |
| 113 | 1  | 0 | 1.811918  | -8.141800  | 4.324512  |
| 114 | 6  | 0 | -1.408857 | -7.069706  | 4.453166  |
| 115 | 1  | 0 | -2.641761 | -6.839433  | 2.690590  |
| 116 | 1  | 0 | 0.098375  | -7.418215  | 5.969804  |
| 117 | 1  | 0 | -2.185122 | -6.748354  | 5.136974  |
| 118 | 7  | 0 | -0.740826 | -7.512527  | 2.182576  |
| 119 | 7  | 0 | 0.943120  | -8.212857  | 0.288596  |
| 120 | 44 | 0 | -1.024523 | -7.585847  | 0.133607  |
| 121 | 6  | 0 | -1.765526 | -10.092328 | -1.205916 |
| 122 | 7  | 0 | -1.577043 | -9.581469  | 0.052185  |
| 123 | 6  | 0 | -2.110922 | -11.436942 | -1.394406 |
| 124 | 1  | 0 | -2.255102 | -11.834010 | -2.391152 |
| 125 | 6  | 0 | -2.267850 | -12.271293 | -0.283248 |
| 126 | 1  | 0 | -2.535051 | -13.313421 | -0.416058 |
| 127 | 6  | 0 | -2.074888 | -11.739133 | 0.999234  |
| 128 | 1  | 0 | -2.187211 | -12.349147 | 1.887341  |
| 129 | 6  | 0 | -1.729518 | -10.393077 | 1.127119  |
| 130 | 1  | 0 | -1.575839 | -9.946372  | 2.100066  |
| 131 | 6  | 0 | -1.578066 | -9.130327  | -2.301368 |
| 132 | 6  | 0 | -1.761265 | -9.439592  | -3.655411 |
| 133 | 6  | 0 | -1.558881 | -8.450633  | -4.622990 |
| 134 | 1  | 0 | -2.059591 | -10.435528 | -3.957038 |
| 135 | 6  | 0 | -1.010175 | -6.913856  | -2.850152 |
| 136 | 6  | 0 | -1.176289 | -7.165837  | -4.212554 |
| 137 | 1  | 0 | -1.697457 | -8.678276  | -5.673751 |
| 138 | 1  | 0 | -0.712762 | -5.936115  | -2.495435 |
| 139 | 1  | 0 | -1.008714 | -6.370038  | -4.928167 |
| 140 | 7  | 0 | -1.203306 | -7.871075  | -1.909790 |
| 141 | 7  | 0 | 7.368802  | 0.853006   | -0.024285 |
| 142 | 44 | 0 | 7.084526  | 2.903075   | -0.056109 |
| 143 | 6  | 0 | 6.625908  | 4.437335   | 2.403856  |
| 144 | 6  | 0 | 7.048991  | 2.178952   | 2.913416  |
| 145 | 6  | 0 | 6.468859  | 4.735372   | 3.763744  |
| 146 | 6  | 0 | 6.905197  | 2.418452   | 4.280656  |

|     |   |   |           |           |           |
|-----|---|---|-----------|-----------|-----------|
| 147 | 1 | 0 | 7.279609  | 1.190805  | 2.538695  |
| 148 | 6 | 0 | 6.609899  | 3.718766  | 4.713714  |
| 149 | 1 | 0 | 6.238840  | 5.743686  | 4.083849  |
| 150 | 1 | 0 | 7.023137  | 1.601747  | 4.982491  |
| 151 | 1 | 0 | 6.491650  | 3.937517  | 5.768850  |
| 152 | 6 | 0 | 6.544152  | 5.759606  | -1.004847 |
| 153 | 6 | 0 | 6.498491  | 5.426663  | 1.323979  |
| 154 | 6 | 0 | 6.289058  | 7.123427  | -0.855092 |
| 155 | 1 | 0 | 6.663516  | 5.317473  | -1.984817 |
| 156 | 6 | 0 | 6.244013  | 6.788154  | 1.534201  |
| 157 | 6 | 0 | 6.138277  | 7.647830  | 0.436312  |
| 158 | 1 | 0 | 6.213534  | 7.753021  | -1.733390 |
| 159 | 1 | 0 | 6.130967  | 7.178425  | 2.537558  |
| 160 | 1 | 0 | 5.942336  | 8.703425  | 0.586069  |
| 161 | 7 | 0 | 6.916107  | 3.162754  | 1.990625  |
| 162 | 7 | 0 | 6.648069  | 4.923775  | 0.057239  |
| 163 | 6 | 0 | 9.602676  | 3.486155  | -1.450377 |
| 164 | 6 | 0 | 9.881802  | 3.722581  | 0.873527  |
| 165 | 6 | 0 | 10.935018 | 3.859483  | -1.669239 |
| 166 | 6 | 0 | 11.216804 | 4.097082  | 0.715424  |
| 167 | 1 | 0 | 9.433720  | 3.654570  | 1.855595  |
| 168 | 6 | 0 | 11.753036 | 4.168459  | -0.577947 |
| 169 | 1 | 0 | 11.333699 | 3.911728  | -2.674317 |
| 170 | 1 | 0 | 11.814614 | 4.327122  | 1.589025  |
| 171 | 1 | 0 | 12.785819 | 4.458267  | -0.734241 |
| 172 | 6 | 0 | 8.659794  | 3.138878  | -2.522971 |
| 173 | 6 | 0 | 6.448479  | 2.509519  | -3.022775 |
| 174 | 6 | 0 | 8.998914  | 3.101366  | -3.881648 |
| 175 | 6 | 0 | 6.728989  | 2.458961  | -4.388925 |
| 176 | 1 | 0 | 5.458304  | 2.288609  | -2.647314 |
| 177 | 6 | 0 | 8.026782  | 2.758644  | -4.826465 |
| 178 | 1 | 0 | 10.006055 | 3.332845  | -4.204282 |
| 179 | 1 | 0 | 5.945183  | 2.189880  | -5.086596 |
| 180 | 1 | 0 | 8.277263  | 2.726475  | -5.880671 |
| 181 | 7 | 0 | 9.086642  | 3.421314  | -0.182156 |
| 182 | 7 | 0 | 7.388497  | 2.842350  | -2.104382 |
| 183 | 6 | 0 | 2.747364  | 2.514817  | -0.057949 |
| 184 | 1 | 0 | 1.893055  | 3.179776  | -0.061358 |
| 185 | 6 | 0 | 0.805169  | -3.634689 | 0.044520  |
| 186 | 1 | 0 | 1.807823  | -3.226432 | 0.038616  |

---

**Table S12.** MO composition of **Ru<sub>3</sub>L** in (*S*=0) ground state in  $\alpha$ -spin.

| MO          | Energy (eV)   | Composition |                |           |
|-------------|---------------|-------------|----------------|-----------|
|             |               | Ruthenium   | 2,2'-bipyridyl | L1        |
| LUMO+5      | -2.801        | 4           | 85             | 11        |
| LUMO+4      | -2.822        | 2           | 96             | 3         |
| LUMO+3      | -2.822        | 2           | 96             | 2         |
| LUMO+2      | -2.958        | 3           | 25             | 72        |
| LUMO+1      | -3.610        | 5           | 3              | 93        |
| <b>LUMO</b> | <b>-3.611</b> | <b>5</b>    | <b>6</b>       | <b>90</b> |
| <b>HOMO</b> | <b>-6.652</b> | <b>76</b>   | <b>16</b>      | <b>8</b>  |
| HOMO-1      | -6.656        | 76          | 15             | 9         |
| HOMO-2      | -6.658        | 76          | 18             | 5         |
| HOMO-3      | -6.818        | 73          | 21             | 6         |
| HOMO-4      | -6.820        | 74          | 20             | 7         |
| HOMO-5      | -6.821        | 74          | 18             | 9         |

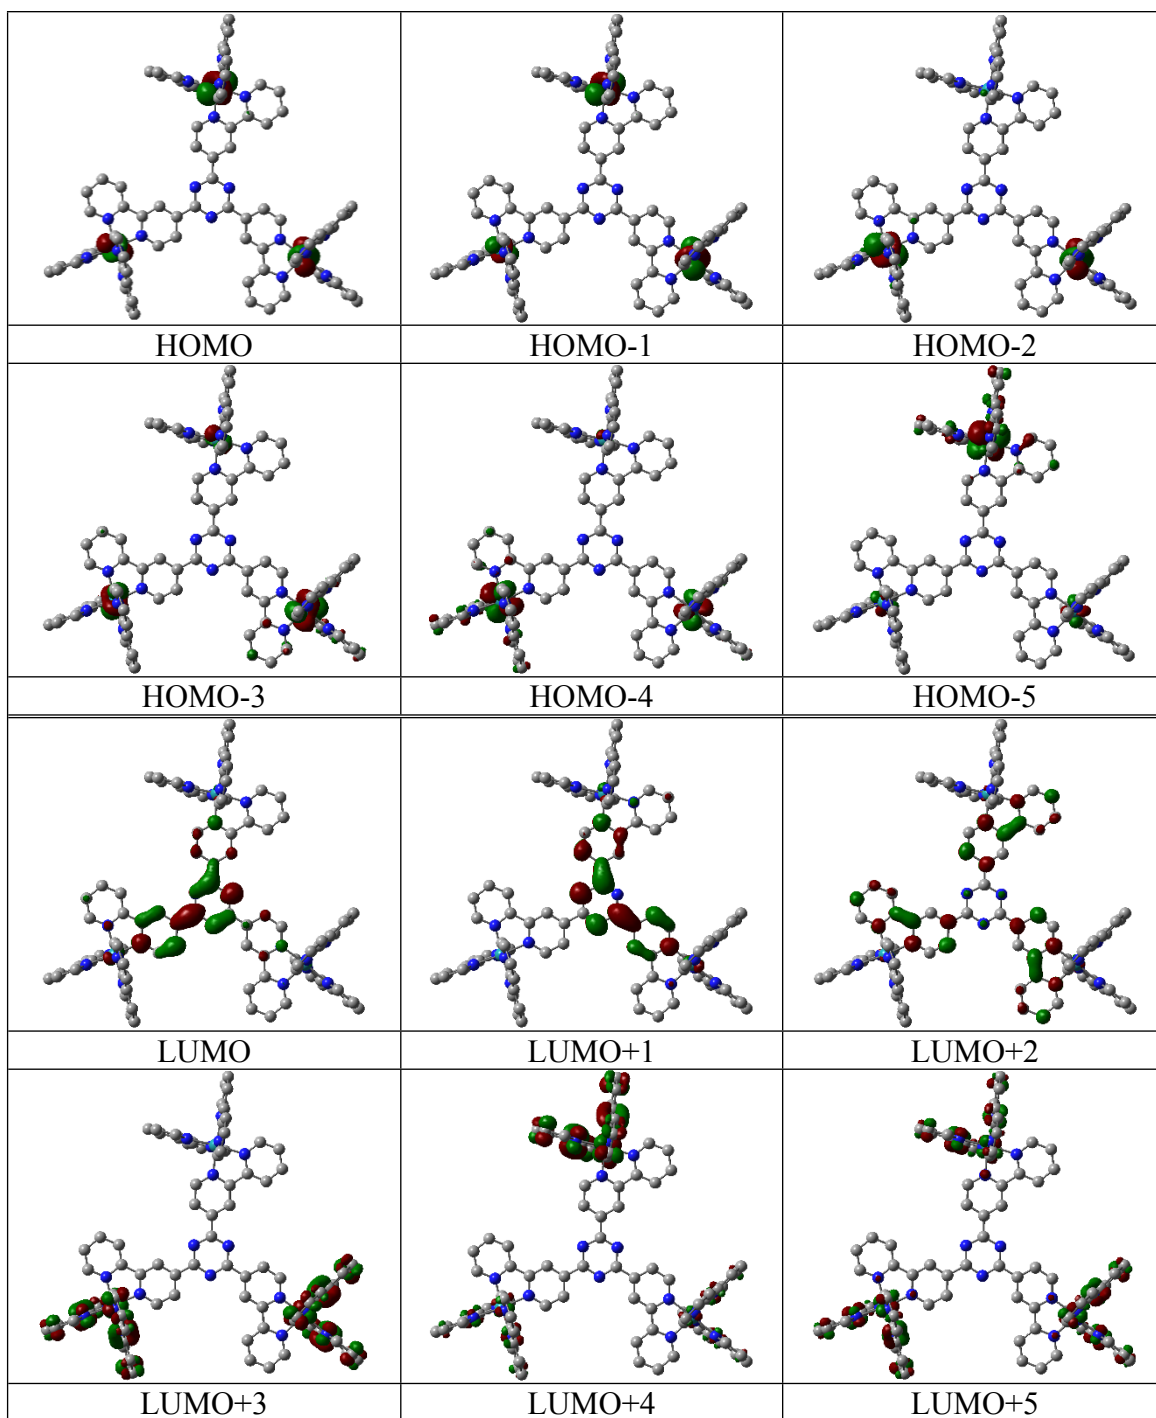

Figure S21. Kohn-Sham molecular orbital diagrams of  $\text{Ru}_3\text{L}$  in ( $S=0$ ) ground state.

**Table S13.** Total energy values for the optimized structure of the first, second and third reduction on complex **Ru<sub>3</sub>L** (uPBE0, LANL2DZ, CPCM: Acetonitrile).

| <b>Ru<sub>2</sub>L</b>    | S   | 2S+1 | Total Energy   |                  |      | Experimental |
|---------------------------|-----|------|----------------|------------------|------|--------------|
|                           |     |      | a. u.          | eV               | ΔeV  | eV           |
| Neutral                   | 0   | 1    | -5010.30553921 | -136337.40876873 | -    | -            |
| 1 <sup>st</sup> reduction | 1/2 | 2    | -5010.45167636 | -136341.38536461 | 3.98 | 3.70         |
| 2 <sup>nd</sup> reduction | 1   | 3    | -5010.57838626 | -136344.83331789 | 3.45 | 3.29         |
| 3 <sup>rd</sup> reduction | 3/2 | 4    | -5010.69236501 | -136347.93483881 | 3.10 | 3.14         |

**Table S14.** Spin contamination monitoring for the DFT calculation of **Ru<sub>3</sub>L** reduced species.

| <b>Ru<sub>3</sub>L</b>    | S   | 2S+1 | S**2                |                    |          |
|---------------------------|-----|------|---------------------|--------------------|----------|
|                           |     |      | Before annihilation | After annihilation | % change |
| 1 <sup>st</sup> reduction | 1/2 | 2    | 0.7651              | 0.7502             | 2        |
| 2 <sup>nd</sup> reduction | 1   | 3    | 2.0203              | 2.0003             | 1        |
| 3 <sup>rd</sup> reduction | 3/2 | 4    | 3.7898              | 3.7508             | 1        |

**Table S15.** Mulliken spin density values for each of the reduced **Ru<sub>3</sub>L** species.

| <b>Ru<sub>3</sub>L</b>    | Mulliken spin density |            |                                        |
|---------------------------|-----------------------|------------|----------------------------------------|
|                           | Ruthenium             | 2,2'-bpy   | tris-4-(2,2'-bpy)-1'',3'',5''-triazine |
| 1 <sup>st</sup> reduction | 0.049 (5%)            | 0.011 (1%) | 0.940 (94%)                            |
| 2 <sup>nd</sup> reduction | 0.044 (4%)            | 0.017 (2%) | 0.938 (94%)                            |
| 3 <sup>rd</sup> reduction | 0.033 (3%)            | 0.058 (6%) | 0.909 (91%)                            |
